1 **Alternative splicing of auxiliary  $\beta$ 2-subunits stabilizes Cav2.3  $\text{Ca}^{2+}$**   
2 **channel activity in continuously active midbrain dopamine neurons**

3

4 **Anita Siller<sup>1</sup>, Nadja T. Hofer<sup>1</sup>, Giulia Tomagra<sup>3</sup>, Nicole Wiederspohn<sup>4</sup>, Simon**  
5 **Hess<sup>5</sup>, Julia Benkert<sup>4</sup>, Aisylu Gaifullina<sup>4</sup>, Desiree Spaich<sup>4</sup>, Johanna Duda<sup>4</sup>,**  
6 **Christina Pötschke<sup>4</sup>, Kristina Vilusic<sup>1</sup>, Eva Maria Fritz<sup>1</sup>, Toni Schneider<sup>2</sup>, Peter**  
7 **Kloppenburger<sup>5</sup>, Birgit Liss<sup>4</sup>, Valentina Carabelli<sup>3</sup>, Emilio Carbone<sup>3</sup>, Nadine J.**  
8 **Ortner<sup>1\*</sup> and Jörg Striessnig<sup>1\*</sup>**

9 <sup>1</sup>Department of Pharmacology and Toxicology, Institute of Pharmacy, Center for Molecular  
10 Biosciences Innsbruck, University of Innsbruck, Innsbruck, Austria;

11 <sup>2</sup>Institute of Neurophysiology, University of Cologne, Cologne, Germany;

12 <sup>3</sup>Department of Drug Science, NIS Centre, University of Torino, Torino, Italy;

13 <sup>4</sup>Institute of Applied Physiology, University of Ulm, Ulm, Germany;

14 <sup>5</sup>Institute for Zoology, Biocenter, CECAD, University of Cologne, Cologne, Germany.

15

16

17 **\*Correspondence:**

18 Nadine J. Ortner (nadine.ortner@uibk.ac.at; +43-512-507-58815) or Jörg Striessnig  
19 ([joerg.striessnig@uibk.ac.at](mailto:joerg.striessnig@uibk.ac.at); +43-512-507-58800)

20

21 **Keywords:** Cav2.3, R-type  $\text{Ca}^{2+}$  channel,  $\beta$ -subunits, alternative splicing, dopaminergic  
22 neurons, Parkinson's disease

23

24

25

26

27 Number of words: 5304

28 Number of figures: 9 (plus 5 supplementary figures)

29 **Abstract**

30 In dopaminergic (DA) substantia nigra (SN) neurons Cav2.3 R-type  $\text{Ca}^{2+}$ -currents contribute  
31 to somatodendritic  $\text{Ca}^{2+}$ -oscillations. These may contribute to the selective degeneration of  
32 these neurons in Parkinson's disease (PD) since Cav2.3-knockout is neuroprotective in a PD  
33 mouse model. However, the typical Cav2.3 gating would predict complete channel inactivation  
34 during SN DA neuronal firing. Here we show that in tsA-201-cells the membrane-anchored  $\beta$ 2-  
35 splice variants  $\beta$ 2a and  $\beta$ 2e stabilize Cav2.3 gating properties allowing sustained Cav2.3  
36 availability during simulated pacemaking and enhanced  $\text{Ca}^{2+}$ -currents during bursts. We  
37 confirmed the expression of  $\beta$ 2a and  $\beta$ 2e-subunits in the SN and identified SN DA neurons.  
38 Patch-clamp recordings of SN DA neurons in mouse brain slices revealed R-type  $\text{Ca}^{2+}$ -currents  
39 similar to  $\beta$ 2a- or  $\beta$ 2e-stabilized Cav2.3-currents and recordings in cultured murine DA neurons  
40 confirmed their activity during pacemaking. Taken together, our data support an important  
41 (patho)physiological role of  $\beta$ -subunit alternative splicing for Cav2.3  $\text{Ca}^{2+}$ -signaling in highly  
42 vulnerable SN DA neurons.

## 43 Introduction

44 Parkinson's disease (PD) is one of the most common neurodegenerative disorders. Its motor  
45 symptoms are characterized by progressive degeneration of dopamine (DA)-releasing neurons  
46 in the substantia nigra (SN), while neighboring DA neurons in the ventral tegmental area (VTA)  
47 remain largely unaffected (Damier et al., 1999; Giguère et al., 2018; Surmeier et al., 2017).  
48 Current PD therapy is only symptomatic and primarily based on the substitution of striatal DA  
49 by administration of L-DOPA or dopamine D2 receptor agonists. Unfortunately, none of the  
50 existing therapeutic approaches for PD patients is disease-modifying and can prevent disease  
51 progression (for review see Liss & Striessnig, 2019; Surmeier et al., 2011; Surmeier et al.,  
52 2017).

53 The development of novel neuroprotective strategies for the treatment of early PD requires the  
54 understanding of the cellular mechanisms responsible for the high vulnerability of SN DA  
55 neurons. Among these mechanisms elevated metabolic stress appears to play a central role  
56 (for review see Liss & Striessnig, 2019), eventually triggering lysosomal, proteasomal and  
57 mitochondrial dysfunction (Burbulla et al., 2017; Surmeier et al., 2017). Intrinsic physiological  
58 properties of SN DA neurons, in particular increased cytosolic DA levels and high energy  
59 demand due to large axonal arborisation favour metabolic stress (Bolam & Pissadaki, 2012;  
60 Liss & Striessnig, 2019). In addition, these neurons must handle a constant intracellular  $Ca^{2+}$ -  
61 load resulting from dendritic and somatic  $Ca^{2+}$ -oscillations triggered during their continuous  
62 electrical activity (Ortner et al., 2017; Surmeier et al., 2011). Dendritic  $Ca^{2+}$ -transients largely  
63 depend on the activity of voltage-gated  $Ca^{2+}$  channels, in particular Cav1.3 L-type (LTCCs)  
64 and T-type channels (Guzman et al., 2018). Cav1.3 channels can activate at subthreshold  
65 membrane potentials (Koschak et al., 2001; Lieb et al., 2014; Xu & Lipscombe, 2001) and do  
66 not completely inactivate during continuous pacemaking activity (Guzman et al., 2018;  
67 Guzman et al., 2009; Ortner et al., 2017). Some, but not all, in vivo studies (Liss & Striessnig,  
68 2019) showed neuroprotection by the systemic administration of dihydropyridine (DHP) L-type  
69 channel blockers in 6-OHDA and MPTP animal models of PD thus further supporting a role of  
70 LTCCs as potential neuroprotective drug target. Based on these preclinical data and  
71 supporting observational clinical evidence (Liss & Striessnig, 2019), the neuroprotective  
72 potential of the DHP isradipine (ISR) was tested in a double-blind, placebo-controlled, parallel-  
73 group phase 3 clinical trial ("STEADY-PD III", NCT02168842; Biglan et al., 2017). This trial  
74 reported no evidence for neuroprotection by ISR. Several explanations have been offered for  
75 this negative outcome (Parkinson Study Group, 2020). One likely explanation is that voltage-  
76 gated  $Ca^{2+}$ -channels (Cavs) other than LTCCs also contribute to  $Ca^{2+}$ -transients in SN DA  
77 neurons. This is supported by the observation that only about 50% of the  $Ca^{2+}$ -transients are  
78 blocked by isradipine in the dendrites of SN DA neurons (Guzman et al., 2018) and that action  
79 potential-associated  $Ca^{2+}$ -transients in the soma appear to be even resistant to isradipine

80 (Ortner et al., 2017). Therefore, in addition to L-type, other types of Cavs expressed in SN DA  
81 neurons (Branch et al., 2014; Evans et al., 2017; Philippart et al., 2016) may also contribute to  
82  $\text{Ca}^{2+}$ -induced metabolic stress in SN DA neurons. Cav2.3 (R-type)  $\text{Ca}^{2+}$ -channels are very  
83 promising candidates. We have recently shown that SN DA neurons in mice lacking Cav2.3  
84 channels were fully protected from neurodegeneration in the chronic MPTP-model of PD.  
85 Moreover, we found that Cav2.3 is the most abundant Cav expressed in SN DA neurons, and  
86 substantially contributes to activity-related somatic  $\text{Ca}^{2+}$ -oscillations (Benkert et al., 2019).  
87 These findings make Cav2.3 R-type  $\text{Ca}^{2+}$  channels a promising target for neuroprotection in  
88 PD.

89 SN DA neurons are spontaneously active, pacemaking neurons, either firing in a low-frequency  
90 single-spike mode or transiently in a high-frequency burst mode (Grace & Bunney, 1984a,  
91 1984b; Paladini & Roeper, 2014). During regular pacemaking their membrane potential is, on  
92 average, rather depolarized ranging from about -70 mV after an action potential (AP) to about  
93 -40 mV at firing threshold (Gantz et al., 2018; Guzman et al., 2018; Ortner et al., 2017). The  
94 contribution of a particular Cav channel to  $\text{Ca}^{2+}$ -entry is therefore largely determined by its  
95 steady-state inactivation properties, which determines its availability at these depolarized  
96 voltages. In Cav2.3 channels expressed with auxiliary  $\alpha 2\delta$  and various  $\beta$ -subunits steady-state  
97 inactivation occurs at much more negative potentials being almost complete at voltages  
98 positive to -50 mV. Moreover, Cav2.3 channels inactivate quickly during depolarizations (Jones  
99 et al., 1998; Pereverzev et al., 2002; Soong et al., 1993; Williams et al., 1994; Yasuda et al.,  
100 2004). Together these properties predict that most of the Cav2.3 channel current is inactivated  
101 during continuous SN DA neuron pacemaking.

102 Here we directly addressed this question by stimulating Cav2.3 channel complexes using  
103 command voltages simulating either SN DA neuron-like tonic pacemaking or brief burst  
104 activity. As previously described for LTCCs (Ortner et al., 2017) we expressed Cav2.3  
105 channels together with auxiliary subunits in tsA-201 cells because individual  $\text{Ca}^{2+}$ -current  
106 components are difficult to resolve in patch-clamp recordings of SN DA neurons in slices. We  
107 found that Cav2.3 currents rapidly decay when co-expressed with  $\beta 3$  and  $\beta 4$  subunits.  
108 However, Cav2.3 remained active during continuous pacemaking in the presence of the  $\beta 2a$   
109 and  $\beta 2e$  splice variants, which stabilize steady-state inactivation of Cav2.3 at more positive  
110 potentials (up to 35 mV more positive compared to  $\beta 3$ ) and considerably slow current  
111 inactivation. In contrast, steady-state inactivation of Cav1.3 channels was largely unaffected  
112 by  $\beta 2a$ , suggesting that Cav1.3 availability is much less dependent on the presence of  $\beta 2a$   
113 subunits. Using RNAScope we confirmed the presence of both,  $\beta 2a$  and  $\beta 2e$  transcripts in  
114 identified mouse SN and VTA DA neurons and quantitative PCR analysis showed that  $\beta 2$ -  
115 subunits represent about 25% of all  $\beta$ -subunit transcripts in the SN and VTA with about 50%  
116 comprising  $\beta 2a$  and  $\beta 2e$  variants. In patch-clamp recordings of SN DA neurons in mouse brain

117 slices we detected R-type  $\text{Ca}^{2+}$ -currents similar to  $\beta 2\text{a}$ - or  $\beta 2\text{e}$ -stabilized Cav2.3-currents and  
118 recordings in cultured DA neurons confirmed R-type current activity during the pacemaking  
119 cycle. Taken together, our data further support a role of Cav2.3 in SN DA neuron  $\text{Ca}^{2+}$ -signaling  
120 and reveal an important (patho)physiological role of  $\beta$ -subunit alternative splicing.

121 **Results**

122 **SNX-482 inhibits Ca<sup>2+</sup> current (I<sub>Ca</sub>) and reduces spontaneous AP firing in cultured mouse**  
123 **midbrain DA neurons**

124 We have recently shown that in mouse SN DA neurons Cav2.3 channels contribute to action  
125 potential (AP)-induced somatic Ca<sup>2+</sup>-oscillations. In Cav2.3-deficient mice the amplitude of the  
126 Ca<sup>2+</sup>-oscillations was decreased by about 50%. This continuous Ca<sup>2+</sup> load can potentially  
127 contribute to the high vulnerability of these neurons in PD (Benkert et al., 2019).

128 To further confirm the presence of functional Cav2.3 channels we investigated effects of the  
129 Cav2.3 blocker SNX-482 on firing frequency and AP shape in spontaneously firing cultured  
130 mouse DA midbrain neurons. We employed SNX-482 at a low concentration (100 nM) to inhibit  
131 Cav2.3 current components (IC<sub>50</sub>=30 nM) but spare L-type channels (IC<sub>50</sub>>1 μM, Bourinet et  
132 al., 2001; Newcomb et al., 1998). SNX-482 had profound effects on firing properties. In current-  
133 clamp recordings it significantly reduced the spontaneous firing frequency from 4.1 ± 0.8 Hz  
134 (control, n=10) to 1.1 ± 0.2 Hz (SNX-482, n=10, p=0.0036, paired Student's t-test; Fig. 1A, B)  
135 and decreased the regularity of pacemaking (coefficient of variation of the mean interspike  
136 interval increased from 0.25 ± 0.06 (control) to 0.78 ± 0.13 (SNX-482, p=0.0032, paired  
137 Student's t-test; Fig. 1B)). Slowing of firing was associated with hyperpolarization of the most  
138 negative voltage reached during the afterhyperpolarization (AHP) immediately after the spike  
139 (AHP peak), which decreased from -43.2 ± 1.3 mV (control) to -47.0 ± 1.2 mV (SNX-482,  
140 p=0.0005, paired Student's t-test; Fig. 1B). Other changes in the AP waveform, which could  
141 represent indirect effects from the slowing of AP frequency or result from inhibition of Cav2.3  
142 channels, were also noted: a reduced mean AP half-width (control: 5.1 ± 0.3 ms, SNX-482: 4.2  
143 ± 0.3 ms, p=0.0050, paired Student's t-test), and a trend towards increased maximum time-  
144 derivative of voltage (control: 45.3 ± 4.9 mV/ms, SNX-482: 74.3 ± 13.5 mV/ms p=0.0625,  
145 paired Student's t-test, estimated from the phase-plane plot of Fig. 1C). The latter is likely due  
146 to the recruitment of more voltage-gated Na<sup>+</sup>-channels during the AP onset from the more  
147 hyperpolarized interspike membrane potential (Guarina et al., 2018; Tomagra et al., 2019).

148 We also isolated SNX-482-sensitive Cav2.3 currents in cultured DA midbrain neurons using  
149 voltage-clamp experiments. In order to exclude that part of the Ca<sup>2+</sup>-current inhibition by SNX-  
150 482 could be attributed to the inhibition of L-type channels, we added SNX-482 (100 nM) after  
151 the complete block of L-type currents (comprising about 25% of total Ca<sup>2+</sup>-current, not shown)  
152 by 3 μM isradipine (ISR). Ca<sup>2+</sup>-currents were elicited by consecutive depolarizing 50-ms square  
153 pulses to 0 mV from a holding potential of -70 mV every 10 s. Once stable recordings were  
154 obtained in the presence of isradipine (see representative experiments in Fig. 2A, B), 100 nM  
155 of SNX-482 were applied. Application of 100 nM SNX-482 significantly reduced non-L-type  
156 currents by 41 ± 4 % (paired Student's t-test; p<0.001) (Fig. 2C) corresponding to an absolute

157 decrease of current amplitude from  $529 \pm 57$  pA to  $313 \pm 33$  pA ( $n=20$ ,  $p<0.01$ , paired Students  
158 t-test) (Fig. 2D). All residual  $I_{Ca}$  components were blocked by adding  $2 \mu\text{M}$   $\text{Cd}^{2+}$  to the bath  
159 solution (Fig. 2A, B).

160 Primary cultures of DA neurons are not very different from freshly dissected identified midbrain  
161 DA neurons (Puopolo et al., 2007) and thus behave differently from SN DA neurons in slices  
162 (Guzman et al., 2009). Nevertheless, our experiments clearly demonstrate that Cav2.3  
163 channels contribute to total  $\text{Ca}^{2+}$ -current and can support pacemaking in cultured mouse DA  
164 neurons. This finding requires that Cav2.3 channels must be continuously available throughout  
165 the average interspike membrane potentials of these cells (between  $-70$  to  $-40$  mV). However,  
166 Cav2.3  $\alpha 1$ -subunits have originally been cloned as a low-voltage gated channel with a negative  
167 steady-state inactivation voltage range ( $V_{0.5,\text{inact}}$   $-78$  mV; Soong et al., 1993) with almost  
168 complete inactivation at voltages positive to  $-50$  mV. R-type currents with such negative  
169 steady-state inactivation properties have also been described in multiple studies in both native  
170 neocortical neurons (Almog & Korngreen, 2009; Sochivko et al., 2002), neurohypophyseal  
171 terminals (Wang et al., 1999), cerebellar granule neurons (Randall & Tsien, 1997; Tottene et  
172 al., 1996) and recombinant channels co-expressed with  $\alpha 2\delta$ - and various  $\beta$ -subunit isoforms  
173 (Jones et al., 1998; Miranda-Laferte et al., 2014; Nakashima et al., 1998; Williams et al., 1994;  
174 Yasuda et al., 2004).

175 To explore how Cav2.3 channels can contribute to DA neuron  $\text{Ca}^{2+}$ -entry during sustained  
176 neuronal activity we expressed Cav2.3  $\alpha 1$ -subunits together with its accessory  $\alpha 2\delta 1$  and  $\beta$ -  
177 subunits in tsA-201 cells under near-physiological conditions. For this purpose we employed  
178 physiological extracellular  $\text{Ca}^{2+}$  ( $2$  mM), weak intracellular  $\text{Ca}^{2+}$ -buffering ( $0.5$  mM EGTA, see  
179 methods), and used AP waveforms recorded from SN DA neurons in mouse midbrain slices  
180 ( $2.5$  Hz) or simulated bursts as command voltages as described (Ortner et al., 2017; see  
181 methods). Moreover, we employed the Cav2.3e  $\alpha 1$ -subunit splice variant for our recordings.  
182 Among the 6 major Cav2.3  $\alpha 1$ -subunit splice variants we only detected Cav2.3e  $\alpha 1$  in UV laser-  
183 microdissected mouse SN DA neurons in experiments using a qualitative single-cell RT-qPCR  
184 approach (Suppl. Fig. 2A,B).

185

### 186 **$\beta$ -subunit isoform-dependent activity of Cav2.3 channels during SN DA neuron-like** 187 **regular pacemaking activity**

188 We first employed  $\beta 3$  and  $\beta 4$  isoforms for co-expression experiments in tsA-201 cells, because  
189 Cav2 channels in the brain appear to be biochemically associated predominantly with these  
190 isoforms (Liu et al., 1996; Scott et al., 1996). When we applied the simulated SN DA neuron  
191 regular pacemaker activity (initiated from a holding potential of  $-89$  mV), large inward currents

192 were observed in response to single AP waveforms (Fig. 3A). Cav2.3 channels conducted  $I_{Ca}$   
193 during the repolarization phase of the AP ( $I_{AP}$ ) without evidence for inward current during the  
194 interspike interval (ISI, Fig. 3A). However,  $I_{AP}$  decreased rapidly during continuous activity and  
195 almost completely disappeared after 1 (co-transfected  $\beta 3$ ) - 2 min (co-transfected  $\beta 4$ ; Fig. 3B,  
196 C). The time course of  $I_{AP}$  decrease was best fitted by a bi-exponential function (see legend to  
197 Fig. 3). Our data, therefore, suggest that Cav2.3e  $\alpha 1$ -subunits, in complex with  $\alpha 2\delta 1$  and  $\beta 3$   
198 or  $\beta 4$ , cannot support substantial inward currents during continuous SN DA neuron  
199 pacemaking activity. This is in contrast to our previously published finding of stable Cav1.3  
200  $Ca^{2+}$ -channel activity persisting under near identical experimental conditions (Cav1.3  
201  $\alpha 1/\alpha 2\delta 1/\beta 3$  previously published data (Ortner et al., 2017) illustrated for comparison in Fig.  
202 3B, C). In agreement with earlier studies (Jones et al., 1998; Yasuda et al., 2004), we found  
203 that recombinant Cav2.3 channels associated with  $\beta 3$  and  $\beta 4$  inactivate at negative voltages  
204 ( $V_{0.5,inact} < -70$  mV) with a rapid inactivation time course ( $\geq 50\%$  within 50 ms, Fig. 4A-C, Table  
205 1). These characteristics can explain the observed rapid loss of Cav2.3 activity during regular  
206 pacemaking.

207 Since Cav2.3 channel gating properties have previously been shown to be fine-tuned by  $\beta$ -  
208 subunits in an isoform-dependent manner (Jones et al., 1998; Yasuda et al., 2004), we  
209 hypothesized that other  $\beta$ -subunits may be required to support long-lasting Cav2.3 activity  
210 during firing patterns typical for spontaneously active DA neurons. First, we tested if  $\beta$ -subunits  
211 are required at all for Cav2.3 activity under our experimental conditions, as Cav2.3  $\alpha 1$ -subunits  
212 have been reported to mediate  $I_{Ca}$  even when expressed in the absence of  $\beta$ -subunits (Jones  
213 et al., 1998; Yasuda et al., 2004). In our experiments, all five tested  $\beta$ -subunits ( $\beta 2a$ ,  $\beta 2d$ ,  $\beta 2e$ ,  
214  $\beta 3$ ,  $\beta 4$ ) caused a robust and highly significant (6-12-fold; Fig. 4A, Table 1) increase in current  
215 densities with a similar activation voltage-range. This implies that  $\beta$ -associated Cav2.3  
216 channels contribute more to overall Cav2.3-mediated currents than channel complexes devoid  
217 of  $\beta$ -subunits and thus can be subject to differential modulation by  $\beta$ -subunits. Therefore, we  
218 investigated the modulation of Cav2.3 by  $\beta 2$ -subunit isoforms, in which N-terminal alternative  
219 splicing strongly affects their modulatory effects. In particular,  $\beta 2a$  and  $\beta 2e$ , which contain N-  
220 termini that can anchor to the plasma membrane, can slow the inactivation time course and  
221 can affect voltage-dependence of inactivation, especially in Cav2 channels (Jones et al., 1998;  
222 Miranda-Laferte et al., 2014; Miranda-Laferte et al., 2012; Yasuda et al., 2004). In contrast, the  
223 modulatory effects of other, non-membrane anchored  $\beta 2$  splice variants, such as  $\beta 2d$ , are  
224 more similar to those of  $\beta 1$ ,  $\beta 3$  and  $\beta 4$ -subunits (Buraei & Yang, 2010). Indeed, also under our  
225 experimental conditions  $\beta 2a$  and  $\beta 2e$  subunits stabilized Cav2.3 voltage-dependent  
226 inactivation at  $\sim 30$  mV more positive potentials compared to  $\beta 4$  (and  $\beta 3$ ), an effect not  
227 observed for  $\beta 2d$  subunits (Fig. 4B, Table 1). In contrast, the voltage-dependence of activation  
228 was not affected and was similar to  $\beta 4$  and all other tested  $\beta$ -subunits (Fig. 4B, Table 1).  $\beta 2a$



229 and in particular  $\beta$ 2e also significantly slowed the inactivation kinetics during prolonged  
230 depolarizations compared to all other  $\beta$ -subunits tested (Fig. 4C, Table 1).  $\beta$ 3 stabilized  
231 significantly faster inactivation kinetics than  $\beta$ 4 and  $\beta$ 2d subunits. Due to the voltage-  
232 dependent inactivation at more depolarized potentials and the resulting overlap of the voltage-  
233 dependence of inactivation and activation (Fig. 4B),  $\beta$ 2a and  $\beta$ 2e subunits induce window  
234 currents at negative potentials as shown in Suppl. Fig. 3.

235

### 236 **$\beta$ -subunit transcripts in mouse SN and VTA**

237 The above findings prompted us to investigate if  $\beta$ 2a and  $\beta$ 2e are indeed expressed in SN DA  
238 neurons and could, therefore, participate in the formation of R-type currents sustained during  
239 pacemaking. We investigated  $\beta$ 1-4 subunit expression patterns in the SN (and VTA for  
240 comparison) (Fig. 5A) dissected from brain slices of 12-14 weeks old male C57Bl/6N mice (Fig.  
241 5C) using a standard curve-based absolute RT-qPCR assay (Schlick et al., 2010; Suppl. Table  
242 1). In both SN and VTA tissue  $\beta$ 4 (SN: ~65%; VTA: ~56%) and  $\beta$ 2 (SN: ~27%; VTA: ~29%)  
243 represented the most abundant  $\beta$ -subunit transcripts, followed by  $\beta$ 1 and  $\beta$ 3 (~5 - 7%) (Fig.  
244 5A). Our findings are in excellent agreement ( $\beta$ 2: 31-35%,  $\beta$ 4: 41-45%) with cell type specific  
245 RNA sequencing data from identified midbrain DA neurons (Brichta et al., 2015; Shin, 2015).

246 Next, we used our standard curve-based RT-qPCR assay to specifically quantify  $\beta$ 2 N-terminal  
247 splice variant transcripts in these brain regions (Fig. 5B; for alignment of N-terminal  $\beta$ 2 splice  
248 variants see Suppl. Fig. 1A). Assays were designed to specifically discriminate between  $\beta$ 2a,  
249  $\beta$ 2b, and  $\beta$ 2e.  $\beta$ 2c and  $\beta$ 2d N-termini (also present on other splice variants comprising the  $\beta$ 2d  
250 N-terminus but with different alternative splicing in the HOOK region; Buraei & Yang, 2010)  
251 were detected by a common assay because selective primer design was difficult (see  
252 Methods). In SN and VTA,  $\beta$ 2a (~30%) and  $\beta$ 2e (~26%) transcripts together comprised about  
253 half of all tested  $\beta$ 2-subunit splice variants,  $\beta$ 2c and  $\beta$ 2d-species about 42% and  $\beta$ 2b only  
254 about 3% (Fig. 5B). Therefore,  $\beta$ 2a and  $\beta$ 2e together should be able to form a substantial  
255 fraction of Cav2.3 channel complexes.

256 We further confirmed the presence of the various N-terminal  $\beta$ 2 splice variants in individual  
257 UV-laser microdissected mouse SN DA neurons at the mRNA level using a qualitative PCR  
258 approach (Suppl. Fig. 2C). Moreover, quantitative RNAScope analysis confirmed the  
259 expression of both,  $\beta$ 2e and  $\beta$ 2a variants, in identified mouse SN and VTA DA neurons with  
260  $\beta$ 2e more abundantly expressed compared to  $\beta$ 2a (Suppl. Fig. 2D).

261

### 262 **$\beta$ 2 splice variant-dependent regulation of Cav2.3 activity during SN DA neuron-like** 263 **regular pacemaking activity**

264 In order to investigate if the depolarizing shifts in steady-state inactivation and slowing of  
265 inactivation kinetics by  $\beta$ 2a and  $\beta$ 2e subunits are sufficient to stabilize Cav2.3 currents during  
266 simulated regular pacemaking activity, we co-expressed these  $\beta$ -subunits with Cav2.3e  
267 channels and stimulated cells with the SN DA neuronal AP waveform as described above for  
268  $\beta$ 3 or  $\beta$ 4 (Fig. 3A). In contrast to  $\beta$ 3 or  $\beta$ 4,  $I_{AP}$  decreased with a much slower time course in the  
269 presence of  $\beta$ 2a or  $\beta$ 2e with about 40% of the maximal initial  $I_{AP}$  still remaining even after 5  
270 min of continuous activity (Fig. 6A-C). The time course of  $I_{AP}$  decrease could be fitted by a bi-  
271 exponential function predicting a steady-state reached at  $32.3 \pm 0.77\%$  ( $n=12$ ) of the initial  $I_{AP}$   
272 for  $\beta$ 2a and  $25.0 \pm 0.12\%$  ( $n=9$ ) for  $\beta$ 2e (see legend to Fig. 6). Similar to co-transfected  $\beta$ 3 or  
273  $\beta$ 4 subunits,  $\beta$ 2a or  $\beta$ 2e supported Cav2.3  $I_{Ca}$  predominantly during the repolarization phase  
274 after the AP spike. However, in accordance with enhanced window currents at more negative  
275 voltages (Suppl. Fig. 3) these subunits also supported an inward current during the interspike  
276 interval (ISI) as evident from the first few sweeps (with the largest current amplitudes) (Fig. 6A,  
277 bottom panel, zoom-in).  $I_{AP}$  persisting after 2 min ( $\beta$ 3,  $\beta$ 4) or 5 min ( $\beta$ 2a,  $\beta$ 2e) of pacemaking  
278 was completely blocked by 100  $\mu$ M  $Cd^{2+}$  and almost complete recovery from  $Cd^{2+}$ -block was  
279 observed upon washout (Fig. 6B).

280 Irreversible loss of  $I_{Ca}$ , a phenomenon also known as current "run-down" widely described for  
281 both native and recombinant Caves (Kepplinger et al., 2000; Ortner et al., 2017; Schneider et  
282 al., 2018) during patch-clamp recordings, may also contribute to the current decay observed  
283 during simulated pacemaking. We, therefore, quantified the contribution of current run-down  
284 for Cav2.3 co-expressed with  $\alpha$ 2 $\delta$ 1 and  $\beta$ 2a or  $\beta$ 3 subunits first by applying short (20 ms)  
285 square pulses to  $V_{max}$  (hp -89 mV) with a frequency of 0.1 Hz (Fig. 7A). With this protocol (short  
286 pulse, long inter-sweep interval, hyperpolarized hp) activity-/voltage-dependent inactivation of  
287 Cav2.3 channels should be minimized. While  $\beta$ 3 co-transfected Cav2.3 channels showed a  
288 time-dependent current run-down after 5 min to about 60% of the peak  $I_{Ca}$ ,  $\beta$ 2a prevented the  
289 current decline during this period (Fig. 7A). To further quantify the current run-down during  
290 simulated pacemaking we interrupted the pacemaking protocol after different time periods by  
291 20 s long pauses at -89 mV to allow channel recovery from inactivation (Fig. 7B). Thus, the  
292 percent run-down can be estimated from the non-recovering current component (Fig. 7B,  
293 horizontal dashed lines). After 30 s of pacemaking the current amplitude during the first AP  
294 after the pause was similar to  $I_{AP}$  during the initial AP with both  $\beta$ -subunits ( $\beta$ 3:  $96.9 \pm 3.63\%$ ,  
295  $\beta$ 2a:  $107.3 \pm 3.66\%$  of the initial  $I_{AP}$ ). After the pause that followed another 1 min of  
296 pacemaking,  $83.6 \pm 7.33\%$  of the initial current was still recovered with co-transfected  $\beta$ 3 but  
297 after 2 more minutes of pacemaking recovery decreased to  $54.7 \pm 6.27\%$  (Fig. 7B; ~45% run-  
298 down after 4.5 min in total,  $n=5$ ). This time course is in good agreement with values obtained  
299 using the square-pulse protocol (Fig. 7A). Again, run-down was largely prevented by co-  
300 expressed  $\beta$ 2a-subunits (Fig. 7B; ~16% run-down after 4.5 min in total,  $n=12$ ).

301 These data clearly demonstrate that the  $I_{AP}$  decrease in response to simulated SN DA neuron  
302 pacemaking (2.5 Hz) is almost completely due to the reversible accumulation of Cav2.3  
303 channels in inactivated states, an effect partially prevented by  $\beta 2a$  and  $\beta 2e$ .

304

### 305 **Cav2.3 $Ca^{2+}$ currents during simulated SN DA burst firing activity**

306 In addition to regular pacemaking activity (in vitro) or irregular single spike mode (in vivo), burst  
307 firing with transient increases in intracellular  $Ca^{2+}$ -load has been associated with  
308 neurodegeneration and selective neuronal vulnerability in Parkinson's disease (Dragicevic et  
309 al., 2015; Schiemann et al., 2012). Thus, we investigated to which extent Cav2.3  $Ca^{2+}$ -  
310 channels can contribute to  $Ca^{2+}$ -entry during bursts and after post-burst hyperpolarizing  
311 pauses of SN DA neurons. After reaching steady-state  $I_{AP}$  during simulated SN DA neuron  
312 pacemaking ( $\beta 4$ : 1-2 min,  $\beta 2a/\beta 2e$ : 5-6 min, see also Fig. 6B) we applied a computer modeled  
313 typical three-spike burst, followed by a 1.5 s long afterhyperpolarization-induced pause at more  
314 negative potentials as a command voltage as previously described (Ortner et al., 2017) (Fig.  
315 8A). First, we quantified to which extent total burst  $Ca^{2+}$ -charge, i.e.  $I_{Ca}$  integrated over the  
316 duration of the burst, changes as compared to total  $Ca^{2+}$ -charge during the same duration of  
317 a single AP in steady-state (calculated as the mean of 3 APs preceding the burst). Integrated  
318  $I_{Ca}$  during the burst was 4-6-fold higher than the mean integrated  $I_{Ca}$  during a steady-state AP  
319 with all co-expressed  $\beta$ -subunits ( $\beta 2a$ ,  $\beta 2e$ ,  $\beta 4$ ) (Fig. 8A, B). However, it has to be considered  
320 that with co-expressed  $\beta 4$  only ~6% of the initial  $I_{AP}$  remained in steady-state during regular  
321 pacemaking. Therefore, this relative increase will cause a much smaller rise in absolute  $Ca^{2+}$   
322 charge compared to  $\beta 2a/\beta 2e$ -associated Cav2.3 where ~40% of  $I_{AP}$  persisted in steady-state  
323 (Fig. 6B).

324 We also investigated if post-burst afterhyperpolarizations would allow Cav2.3 channels to  
325 recover from inactivation and thus mediate increased  $Ca^{2+}$ -entry during the first APs after the  
326 burst. We first determined the recovery from inactivation of Cav2.3 channels co-expressed  
327 with  $\alpha 2\delta 1$  and  $\beta 4$  or  $\beta 2a$  using a square-pulse protocol (Fig. 8C; 1-s conditioning prepulse to  
328  $V_{max}$  to inactivate Cav2.3 channels followed by a 10 ms step to  $V_{max}$  after different time periods  
329 at -89 mV). About 30% of currents recovered under these experimental conditions after 1.5  
330 seconds at -89 mV with both co-expressed  $\beta 4$  and  $\beta 2a$  (~6-fold increase of the remaining  $I_{Ca}$   
331 after 1s at  $V_{max}$ ). In contrast, recovery during the hyperpolarizing pause after the burst of the  
332 AP protocol was much less pronounced ( $\beta 4$ ) or absent ( $\beta 2a$ ,  $\beta 2e$ ) (Fig. 8B). This may be due  
333 to the different pulse protocols inducing channel inactivation over different time periods. This  
334 may stabilize inactivated states with different recovery times.

335 Taken together, these data predict that  $\beta 2a$ - and  $\beta 2e$ -associated Cav2.3 channels can  
336 contribute to enhanced  $Ca^{2+}$ -entry during brief burst activity but not during post-burst APs.

337 Since palmitoylation is reversible and regulated in an activity-dependent localized manner  
338 (Bijlmakers & Marsh, 2003; Matt et al., 2019), we also investigated the contribution of  
339 palmitoylation of  $\beta 2a$  for Cav2.3e modulation under our experimental conditions. To mimic the  
340 de-palmitoylated form, we replaced the two N-terminal cysteines to serines ( $c_{3S}/c_{4S}\beta 2a$ ) which  
341 prevents plasma membrane anchoring of  $\beta 2a$  (Gebhart et al., 2010; Qin et al., 1998). As shown  
342 in Suppl. Fig. 4,  $c_{3S}/c_{4S}\beta 2a$  significantly shifted  $V_{0.5,inact}$  of Cav2.3 to more positive voltages as  
343 compared to  $\beta 3$  but to a much smaller extent ( $< 14$  mV) than  $\beta 2a$  (+35 mV) (Table 1). Due to  
344 this prominent role of palmitoylation on the  $V_{0.5,inact}$  of Cav2.3 channels, the palmitoylation state  
345 of  $\beta 2a$  should allow further fine-tuning of non-inactivating current components of Cav2.3  
346 channels in SN DA neurons. As illustrated in Suppl. Fig. 4, the effects of  $\beta 2a$  palmitoylation on  
347 the inactivation kinetics and inactivation voltage of Cav1.3 L-type channels (Suppl. Fig. 4A,C)  
348 were different from Cav2.3, suggesting that palmitoylation/depalmitoylation events would  
349 regulate  $Ca^{2+}$  channel function in a subtype-selective manner.

350

### 351 **Steady-state activation and inactivation of R-type currents in mouse SN DA neurons**

352 We have recently shown in whole-cell patch-clamp recordings that 100 nM SNX-482 inhibit  
353 ~30% of total Cav currents in mouse SN DA neurons (Benkert et al., 2019) when stimulated  
354 from a holding potential of -70 mV. If membrane-anchored  $\beta 2$ -subunits stabilize more positive  
355  $V_{0.5,inact}$  of Cav2.3 channels in SN DA neurons then the voltage-dependent inactivation of the  
356 R-type currents should allow channels to be available even at voltages positive to -40 mV.  
357 Using whole-cell patch-clamp recordings (Fig. 9), we therefore measured the steady-state  
358 inactivation of R-type  $I_{Ca}$  in identified SN DA neurons in midbrain slices. R-type current was  
359 isolated as the current remaining after preincubation of slices with selective inhibitors of Cav1  
360 (1  $\mu M$  isradipine), Cav2 (Cav2.1, Cav2.2; 1  $\mu M$   $\omega$ -Conotoxin MVIIC) and Cav3 (10  $\mu M$  Z941)  
361 (Fig. 9, blue traces/symbols). The voltage-dependence for steady-state inactivation for R-type  
362  $I_{Ca}$  was ~5 mV more positive than for total  $I_{Ca}$  ( $V_{0.5,inact}$  -52.4  $\pm$  1.58 vs -47.5  $\pm$  1.38 mV,  $p < 0.05$ ;  
363 Fig. 9A, Table 3) and very similar to recombinant Cav2.3 currents expressed with  $\alpha 2\delta 1$  plus  
364  $\beta 2a$  or  $\beta 2e$  subunits (~ -40 mV, Table 1). R-type current evoked from -100 mV activated at  
365 about 8 mV more positive voltages than total  $I_{Ca}$  (Fig. 9A, Table 3 for statistics). This  
366 observation is also in accordance with the positive activation voltage range of Cav2.3 channels  
367 measured in tsA-201 cells.

368 We independently confirmed the presence of SNX-482-sensitive R-type currents also using  
369 perforated patch recordings in identified SN DA neurons. From an even more positive holding

370 potential of -60 mV, where a fraction of Cav2.3 channels must already be inactivated (Fig. 9A),  
371 still about 13% of  $I_{Ca}$  was inhibited by acute bath application of SNX-482 and inhibition was  
372 partially reversible upon washout (Suppl Fig. 5, Suppl. Table 7).

373 These data are consistent with our finding of a contribution of  $\beta$ 2a and/or  $\beta$ 2e subunits to  
374 Cav2.3-mediated R-type current modulation. They also provide the first detailed analysis of  
375 Cav2.3-mediated R-type currents in identified SN DA neurons.

376

## 377 Discussion

378 Although the modulation of Cavs by  $\beta$ -subunits and the characteristic gating changes induced  
379 by N-terminally membrane-anchored  $\beta$ 2-subunit splice variants have been well described in  
380 the literature, the physiological significance of these findings remained underexplored. Here  
381 we provide strong evidence for an important role of  $\beta$ -subunit alternative splicing for Cav2.3  
382  $\text{Ca}^{2+}$ -channel signaling during continuous SN DA neuron-like regular pacemaking activity. We  
383 show that only  $\beta$ 2a and  $\beta$ 2e stabilize Cav2.3 channel complexes with voltage-dependent  
384 inactivation properties preventing complete inactivation during the on-average depolarized  
385 membrane potentials encountered during the pacemaking cycle. This cannot only explain our  
386 finding of a substantial contribution of SNX-482-sensitive R-type currents to activity-dependent  
387 somatic  $\text{Ca}^{2+}$ -oscillations in SN DA neurons in brain slices (Benkert et al., 2019) but also to  
388 pacemaking frequency in cultured DA neurons. We also provide evidence for the expression  
389 of  $\beta$ 2a and  $\beta$ 2e subunit splice variants in highly vulnerable SN DA and in more resistant VTA  
390 DA neurons. Together with our finding that R-type currents in SN DA neurons are available  
391 within a voltage range very similar to heterologously expressed  $\beta$ 2a- and  $\beta$ 2e- stabilized  
392 Cav2.3 channel complexes, our data therefore strongly suggest that these subunits are  
393 required for normal DA neuron function and may also account for the previously reported  
394 pathogenic potential of Cav2.3  $\text{Ca}^{2+}$ -channels in PD pathophysiology (Benkert et al., 2019).

395 We have previously shown that Cav2.3-knockout mice are protected from the selective loss of  
396 SN DA neurons in the chronic MPTP/probenecid PD model (Benkert et al., 2019). At least in  
397 this rodent model of PD, the observed protection provides strong evidence for a role of these  
398 channels in PD pathology. Pharmacological inhibition of Cav2.3 alone or together with other  
399 Cavs may, therefore, confer beneficial disease-modifying effects and a novel approach for  
400 neuroprotection in PD. The recent failure of the L-type  $\text{Ca}^{2+}$  channel blocker isradipine in the  
401 STEADY-PD trial (Parkinson Study Group, 2020) to prevent disease progression in early PD  
402 patients indicates that inhibition of L-type channels alone may not be sufficient for  
403 neuroprotection. Our previous preclinical findings identifying Cav2.3 channels as novel drug  
404 targets for neuroprotective PD-therapy are now supported by demonstrating R-type-mediated  
405  $I_{\text{Ca}}$  in identified SN DA neurons with voltage-dependent gating properties likely stabilized by  
406 Cav2.3 association with  $\beta$ 2a and/or  $\beta$ 2e. Therefore, the inhibition of Cav2.3 in addition to  
407 Cav1.3 may be required for clinically meaningful neuroprotection. However, Cav2.3-mediated  
408 R-type currents are notoriously drug-resistant (Schneider et al., 2013), and so far no selective  
409 potent small-molecule Cav2.3/R-type blocker has been reported.

410 Our findings reported here now provide the rationale for exploring novel neuroprotective  
411 strategies based on Cav2.3 channel inhibition. These could take advantage of the strong  
412 dependence of continuous Cav2.3 channel activity on gating properties such as those

413 stabilized by  $\beta$ 2a and/or  $\beta$ 2e. Rather than inhibiting  $\text{Ca}^{2+}$ -entry through the pore-forming  $\alpha$ 1-  
414 subunit, such a strategy could aim at reducing its contribution to the R-type current component  
415 persisting during continuous activity in SN DA neurons by interfering with the association of  
416  $\beta$ 2a and  $\beta$ 2e subunits. Even if other  $\beta$ -subunits would replace them in the channel complex  
417 and ensure its stable expression, our data suggest that they would not be able to shift the  
418 steady-state inactivation voltage into the operating voltage range of SN DA neurons like  $\beta$ 2a  
419 and  $\beta$ 2e. Such an approach appears realistic due to the availability of novel genetically  
420 encoded  $\text{Ca}^{2+}$ -channel inhibitors for a cell-type-specific gene therapeutic intervention. One  
421 such approach (CaVablator) has elegantly been used to specifically target  $\text{Ca}^{2+}$ -channel  $\beta$ -  
422 subunits for degradation by fusing  $\beta$ -specific nanobodies with the catalytic HECT domain of  
423 Nedd4L, an E3 ubiquitin ligase (Morgenstern et al., 2019). This strongly reduces Cav1- and  
424 Cav2-mediated  $\text{Ca}^{2+}$ -currents in different cell types. At present, it is unclear to which extent  
425 other high-voltage activated Cav2 channels (Cav2.1, Cav2.2) also contribute to the high  
426 vulnerability of SN DA neurons. However, our recent quantitative RNAScope analyses in  
427 mature SN DA neurons (Benkert et al., 2019), clearly demonstrate that Cav2.3  $\alpha$ 1-subunit  
428 (*Cacna1e*) transcripts are the most abundant  $\alpha$ 1-subunit expressed in these cells, in excellent  
429 agreement with cell type-specific RNAseq data of identified midbrain dopaminergic neurons  
430 (Brichta et al., 2015).

431 We also show that in cultured mouse DA neurons, Cav2.3 channels can contribute to  
432 pacemaking. SNX-482 is also a potent blocker of Kv4.3 channels (Kimm & Bean, 2014)  
433 underlying A-type  $\text{K}^{+}$ -currents ( $I_A$ ). 60 nM nearly fully block reconstituted Kv4.3 currents in HEK  
434 cells ( $\text{IC}_{50} \sim 3$  nM). Therefore, one can argue that in current-clamp recordings, 50-300 nM  
435 SNX-482 could alter pacemaking or the AP shape by effectively blocking Kv4.3 channels.  
436 However, our data on spontaneously firing DA neurons show very clearly that 100 nM SNX-  
437 482 causes a shortening and a reduced frequency of spontaneous APs, while a block of  $I_A$   
438 channels typically induces a broadening of APs in several neuronal preparations (Kim et al.,  
439 2005) and an increased frequency in DA neurons (Liss et al., 2001). Therefore, the observed  
440 changes induced by SNX-482 strongly argue for a role of non-inactivating Cav2.3-mediated R-  
441 type currents for pacemaking in DA neurons in culture.

442 A limitation of our work is that our experiments do not provide direct proof for a role of  $\beta$ 2-  
443 subunit splice variants for R-type current modulation. Therefore, a similar role of other  
444 posttranslational modifications of Cav2.3 channels or protein interaction partners expressed at  
445 somatodendritic locations of SN DA neurons (such as Rab3-interacting proteins at axonal  
446 sites, Kiyonaka et al., 2007; Robinson et al., 2019) cannot be excluded. Direct proof for a role  
447 of  $\beta$ 2-subunit splice variants would require a splice-variant-specific gene knockout or siRNA-  
448 mediated knock-down of both  $\beta$ 2a and  $\beta$ 2e subunits in SN DA neurons, followed by isolation  
449 of Cav2.3 current components which is methodologically challenging in these neurons.

450 Nevertheless, we provide the first example for a physiological and perhaps even  
451 pathophysiological role of  $\beta$ 2-subunit alternative splicing emphasizing a need for further  
452 investigation in other types of neurons.

453

## 454 **Materials and Methods**

### 455 **Animals**

456 For quantitative real-time PCR (RT-qPCR) experiments, male C57BL/6N mice were bred in  
457 the animal facility of the Centre for Chemistry and Biomedicine (CCB) of the University of  
458 Innsbruck (approved by the Austrian Animal Experimentation Ethics Board). For  
459 electrophysiological experiments of cultured midbrain DA neurons, C57Bl/6 TH-GFP mice  
460 (Matsushita et al., 2002; Sawamoto et al., 2001) were kept heterozygous via breeding them  
461 with C57Bl/6 mice (in accordance with the European Community's Council Directive  
462 2010/63/UE and approved by the Italian Ministry of Health and the Local Organism responsible  
463 for animal welfare at the University of Torino; authorization DGSAF 0011710-P-26/07/2017).  
464 All animals were housed under a 12 hours light/dark cycle with food and water ad libitum. For  
465 whole cell voltage-clamp recordings of SN DA neurons in acute brain slices as well as single-  
466 cell RT-qPCR, juvenile male C57Bl/6 mice (PN11-13) were bred at the animal facility of Ulm  
467 University. For RNAScope analysis, adult male C57Bl/6 mice and Cav2.3 WT mice were bred  
468 at the animal facility of Ulm University. Animal procedures at the Universities of Ulm  
469 (Regierungspräsidium Tübingen, Ref: 35/9185.81-3; Reg. Nr. o.147) and Cologne (LANUV  
470 NRW, Recklinghausen, Germany (84-02.05.20.12.254) were approved by the local authorities.

### 471 **RNA isolation and cDNA synthesis for tissue RT-qPCR**

472 Tissue was dissected after mice had been sacrificed by cervical dislocation under isoflurane  
473 (Vetflurane, Vibac UK, 1000 mg/g) anesthesia and RNA isolation and cDNA synthesis for  
474 tissue RT-qPCR was performed as described in Supplemental Methods.

### 475 **Quantitative RT-qPCR of mouse brain tissue samples**

476 Fragments of  $\beta$ -subunits and  $\beta$ 2 splice variants were amplified from mouse whole brain cDNA  
477 utilizing specific primers (Suppl. Table 1) and subcloned into the Cav1.3 8a 42 pGFP<sup>minus</sup> vector  
478 after restriction enzyme digestion using Sall and HindIII. Primer sequences for  $\beta$ 1- $\beta$ 4 have  
479 been described previously (Schlick et al., 2010), but additional Sall and HindIII restriction  
480 enzyme sites (underlined in Suppl. Table 1) were inserted to allow subsequent ligation of  
481 fragments into the digested vector. TaqMan gene expression assays (Thermo Fisher Scientific,  
482 Waltham, MA, USA) and custom-made TaqMan gene expression assays were designed to



483 span exon-exon boundaries (Suppl. Table 1) as already described (Nadine J. Ortner et al.,  
484 2020).

485 The expression of  $\beta 1$ ,  $\beta 2$ ,  $\beta 3$ ,  $\beta 4$ ,  $\beta 2a$ ,  $\beta 2b$ ,  $\beta 2c-d$ , and  $\beta 2e$  was assessed using a standard  
486 curve method-based on PCR fragments of known concentration (Nadine J. Ortner et al., 2020;  
487 Schlick et al., 2010).  $\beta 2c$  and  $\beta 2d$  were detected by a common assay as selective primer  
488 design failed due to high sequence similarity. This assay binds at the exon-exon boundary of  
489 exons 2A and 3 of  $\beta 2c$  and  $\beta 2d$  and also recognizes a number of splice variants comprising  
490 the  $\beta 2d$  N-terminus but with different alternative splicing in the HOOK region of the subunit  
491 (Buraei & Yang, 2010). Details about assay specificity are given in Suppl. Fig.1.

#### 492 **cDNA constructs**

493 For transient transfections hCav2.3e (cloned into pcDNA3, Pereverzev et al., 2002) or  
494 hCav1.3<sub>L</sub> (human C-terminally long Cav1.3 splice variant; GenBank accession number  
495 EU363339)  $\alpha 1$  subunits were transfected together with the previously described accessory  
496 subunit constructs:  $\beta 3$  (rat, NM\_012828, Koschak et al., 2001),  $\beta 2a$  (rat, M80545, Koschak et  
497 al., 2001),  $\beta 2d$  (mouse,  $\beta 2aN1$ , FM872408.1; Link et al., 2009),  $\beta 2e$  (mouse,  $\beta 2aN5$ ,  
498 FM872407; Link et al., 2009, where  $\beta 2d$  and  $\beta 2e$  were kindly provided by V. Flockerzi,  
499 Saarland University, Homburg),  $c3S/c4S\beta 2a$  (cysteine residues in position 3 and 4 of  $\beta 2a$   
500 replaced by serines, Gebhart et al., 2010) or  $\beta 4$  (rat, splice variant  $\beta 4e$ , kindly provided by Dr.  
501 Bernhard Flucher, Medical University Innsbruck; Etemad et al., 2014) and  $\alpha 2\delta 1$  (rabbit,  
502 NM\_001082276, Koschak et al., 2001).

#### 503 **Cell culture and transfection**

504 TsA-201 cells (European Collection of Cell Culture, catalog #96121229) were cultured as  
505 described (N. J. Ortner et al., 2020) in Dulbecco's modified Eagle's medium (DMEM; Sigma-  
506 Aldrich, catalog #D6546) that was supplemented with 10% fetal bovine serum (FBS, Gibco,  
507 catalog #10270-106), 2 mM L-glutamine (Gibco, catalog #25030-032), penicillin (10 units/ml,  
508 Sigma, P-3032) and streptomycin (10  $\mu$ g/ml, Sigma, S-6501). Cells were maintained at 37°C  
509 and 5% CO<sub>2</sub> in a humidified incubator and were subjected to a splitting procedure after  
510 reaching ~80% confluency. For splitting, cells were dissociated using 0.05% trypsin after  
511 implementing a washing step using 1 x phosphate buffered saline (PBS). TsA-201 cells were  
512 replaced and freshly thawed when they exceeded passage no. 21. For electrophysiology, cells  
513 were plated on 10-cm culture dishes and subjected to transient transfections on the following  
514 day. Cells were transiently transfected using Ca<sup>2+</sup>-phosphate as previously described (Ortner  
515 et al., 2014) with 3  $\mu$ g of  $\alpha 1$  subunits, 2  $\mu$ g of  $\beta$  subunits, 2.5  $\mu$ g of  $\alpha 2\delta 1$  subunits and 1.5  $\mu$ g  
516 of eGFP to visualize transfected cells. On the next day, cells were plated onto 35-mm culture

517 dishes that were coated with poly-L-lysine, kept at 30°C and 5% CO<sub>2</sub> and were then subjected  
518 to whole-cell patch-clamp experiments after 24-72 hours.

### 519 **Primary cell culture of midbrain DA neurons**

520 As described in Tomagra et al., 2019, the methods for the primary culture of mesencephalic  
521 dopamine neurons from substantia nigra (SN) were adapted from Pruszek et al., 2009. Briefly,  
522 the ventral mesencephalon area was dissected from embryonic (E15) C57Bl/6 TH-GFP mice  
523 (Matsushita et al., 2002; Sawamoto et al., 2001) that were kept heterozygous via breeding  
524 them with C57Bl/6J mice. HBSS (Hank's balanced salt solution, without CaCl<sub>2</sub> and MgCl<sub>2</sub>),  
525 enriched with 0.18% glucose, 1% BSA, 60% papain (Worthington, Lakewood, NJ, United  
526 States), 20% DNase (Sigma-Aldrich) was stored at 4°C and used as digestion buffer. Neurons  
527 were plated at final densities of 600 cells per mm<sup>2</sup> on Petri dishes. Cultured neurons were used  
528 at 8/9 days in vitro (DIV) for current-clamp and voltage-clamp experiments. Petri dishes were  
529 coated with poly-L-Lysine (0.1 mg/ml) as substrate adhesion. Cells were incubated at 37°C in  
530 a 5% CO<sub>2</sub> atmosphere, with Neurobasal Medium containing 1% pen-strep, 1% ultra-glutamine,  
531 2% B-27, and 2.5% FBS dialyzed (pH 7.4) (as previously described in Tomagra et al., 2019).

### 532 **Whole-cell patch-clamp recordings in tsA-201 cells**

533 For whole-cell patch-clamp recordings, patch pipettes with a resistance of 1.5-3.5 MΩ were  
534 pulled from glass capillaries (Borosilicate glass, catalog #64-0792, Harvard Apparatus, USA)  
535 using a micropipette puller (Sutter Instruments) and fire-polished with a MF-830 microforge  
536 (Narishige, Japan). Recordings were obtained in the whole-cell configuration using an  
537 Axopatch 200B amplifier (Axon Instruments, Foster City, CA), digitized (Digidata 1322A  
538 digitizer, Axon Instruments) at 50 kHz, low-pass filtered at 5 kHz and subsequently analyzed  
539 using Clampfit 10.7 Software (Molecular Devices). Linear leak and capacitive currents were  
540 subtracted online using the P/4 protocol (20ms I-V protocol) or offline using a 50 ms  
541 hyperpolarizing voltage step from -89 to -99 mV or -119 to -129 mV. All voltages were corrected  
542 for a liquid junction potential (JP) of -9 mV (Lieb et al., 2014). Compensation was applied for  
543 70-90% of the series resistance. For transient transfections in general at least three  
544 independent transfections were performed.

545 The pipette internal solution for recordings of Cav2.3 contained (in mM): 144.5 CsCl, 10  
546 HEPES, 0.5 Cs-EGTA, 1 MgCl<sub>2</sub>, 4 Na<sub>2</sub>ATP adjusted to pH 7.4 with CsOH (299 mOsm/kg). The  
547 pipette internal solution for recordings of Cav1.3 contained (in mM): 135 CsCl, 10 HEPES, 10  
548 Cs-EGTA, 1 MgCl<sub>2</sub>, 4 Na<sub>2</sub>ATP adjusted to pH 7.4 with CsOH (275 mOsm/kg). The bath solution  
549 for recordings of Cav2.3 contained (in mM): 2 CaCl<sub>2</sub>, 10 HEPES, 170 Choline-Cl and 1 MgCl<sub>2</sub>  
550 adjusted to pH 7.4 with CsOH. The bath solution for recordings of Cav1.3 contained (in mM):  
551 15 CaCl<sub>2</sub>, 10 HEPES, 150 Choline-Cl and 1 MgCl<sub>2</sub> adjusted to pH 7.4 with CsOH.

552 Current-voltage (I-V) relationships were obtained by applying a 20 ms long square pulse  
553 protocol to various test potentials (5 mV voltage steps) starting from a holding potential (hp) of  
554 -119 mV or -89 mV (recovery of inactivation). The resulting I-V curves were fitted to the  
555 following equation:

$$556 \quad I = G_{max}(V - V_{rev}) / (1 + \exp\left[-\frac{V - V_{0.5}}{k}\right]),$$

557 where I is the peak current amplitude,  $G_{max}$  is the maximum conductance, V is the test potential,  
558  $V_{rev}$  is the extrapolated reversal potential,  $V_{0.5}$  is the half-maximal activation voltage, and k is  
559 the slope factor. The voltage dependence of  $Ca^{2+}$ -conductance was fitted using the following  
560 Boltzmann relationship:

$$561 \quad G = G_{max} / (1 + \exp\left[-\frac{V - V_{0.5}}{k}\right])$$

562 The voltage dependence of inactivation was assessed by application of 20 ms test pulses to  
563 the voltage of maximal activation ( $V_{max}$ ) before ( $I_{control}$ ) and after holding the cell at various  
564 conditioning test potentials for 5 s (30 s inter-sweep interval; 10 mV voltage steps; hp -119  
565 mV). Inactivation was calculated as the ratio between the current amplitudes of the 20 ms test  
566 pulses. Steady-state inactivation parameters were obtained by fitting the data to a modified  
567 Boltzmann equation:

$$568 \quad I = (1 - I_{control}) / (1 + \exp\left[\frac{V - V_{0.5, inact}}{k_{inact}}\right]) + I_{control},$$

569 where  $V_{0.5, inact}$  is the half-maximal inactivation voltage, and  $k_{inact}$  is the inactivation slope factor.

570 The amount of inactivation during a 5 s depolarizing pulse from a hp of -119 mV to the  $V_{max}$   
571 was quantified by calculating the remaining current fraction after 50, 100, 250, 500, 1000 and  
572 5000 ms. Recovery from inactivation was determined by 10 ms test pulses to  $V_{max}$  at different  
573 time-points (in s: 0.001, 0.003, 0.01, 0.03, 0.1, 0.3, 0.6, 1, 1.5, 2, 3, 4, 6, 8, 10, 15, 20) after a  
574 1-s conditioning pulse to  $V_{max}$  (hp -89 mV). Window current was determined by multiplying  
575 mean current densities by fractional currents from steady-state inactivation curves to obtain  
576 the fraction of available channels at a given potential as described previously (Hofer et al.,  
577 2020). The SN DA regular pacemaking command voltage protocol obtained from an identified  
578 TH<sup>+</sup> SN DA neuron in a mouse brain slice (male, P12) and the SN DA burst firing protocol were  
579 generated as previously described (Ortner et al., 2017). Cells were perfused by an air  
580 pressure-driven perfusion system (BPS-8 Valve Control System, ALA Scientific Instruments)  
581 with bath solution and a flow rate of 0.6 ml/min. For  $Cd^{2+}$ -block, cells were perfused with 100  
582  $\mu$ M  $Cd^{2+}$  to achieve full block, followed by wash-out with bath solution. A complete exchange  
583 of the solution around the cell was achieved within <50 ms. All experiments were performed at  
584 room temperature (~22°C).

## 585 **Voltage- and current-clamp recordings in cultured midbrain DA neurons**

586 Macroscopic whole-cell currents and APs were recorded using an EPC 10 USB HEKA amplifier  
587 and Patchmaster software (HEKA Elektronik GmbH) following the procedures described  
588 previously (Baldelli et al., 2005; Gavello et al., 2018). Traces were sampled at 10 kHz and  
589 filtered using a low-pass Bessel filter set at 2 kHz. Borosilicate glass pipettes (Kimble Chase  
590 life science, Vineland, NJ, USA) with a resistance of 7-8 M $\Omega$  were used. Uncompensated  
591 capacitive currents were reduced by subtracting the averaged currents in response to P/4  
592 hyperpolarizing pulses. Off-line data analysis was performed with pClamp 10.0 software for  
593 current clamp recordings. Ca<sup>2+</sup> currents were evoked by applying a single depolarization step  
594 (50 ms duration), from a holding of -70 mV to 0 mV. Fast capacitive transients due to the  
595 depolarizing pulse were minimized online by the patch-clamp analog compensation. Series  
596 resistance was compensated by 80% and monitored during the experiment.

597 For current-clamp experiments the pipette internal solution contained in mM: 135 gluconic acid  
598 (potassium salt: K-gluconate), 10 HEPES, 0.5 EGTA, 2 MgCl<sub>2</sub>, 5 NaCl, 2 ATP-Tris and 0.4  
599 Tris-GTP (Tomagra et al., 2019). For voltage-clamp recordings the pipette internal solution  
600 contained in mM: 90 CsCl, 20 TEA-Cl, 10 EGTA, 10 glucose, 1 MgCl<sub>2</sub>, 4 ATP, 0.5 GTP and 15  
601 phosphocreatine adjusted to pH 7.4. The extracellular solution for current/voltage-clamp  
602 recordings (Tyrode's solution) contained in mM: 2 CaCl<sub>2</sub>, 10 HEPES, 130 NaCl, 4 KCl, 2 MgCl<sub>2</sub>,  
603 10 glucose adjusted to pH 7.4. Patch-clamp experiments were performed using pClamp  
604 software (Molecular Devices, Silicon Valley, CA, United States). All experiments were  
605 performed at a temperature of 22–24°C. Data analysis was performed using Clampfit software.  
606 To study the contribution of Cav2.3 channels to the total Ca<sup>2+</sup> current, cells were perfused with  
607 recording solution (containing in mM: 135 TEA, 2 CaCl<sub>2</sub>, 2 MgCl<sub>2</sub>, 10 HEPES, 10 glucose  
608 adjusted to pH 7.4) complemented with 300 nM TTX and 3  $\mu$ M ISR to block voltage-dependent  
609 Na<sup>+</sup> and L-type Ca<sup>2+</sup> channels. SNX-482 (100 nM) was used in current- and voltage-clamp  
610 experiments. Furthermore, kynurenic acid (1 mM), 6,7-dinitroquinoxaline-2,3-dione (DNQX)  
611 (20  $\mu$ M) and picrotoxin (100  $\mu$ M) were present in the extracellular solution for current- and  
612 voltage-clamp experiments.

## 613 **Whole cell voltage-clamp recordings of SN DA neurons in acute brain slices**

614 Whole-cell patch-clamp recordings were performed essentially as previously described  
615 (Benkert et al., 2019). In brief, murine (PN11-13) coronal midbrain slices were prepared in ice-  
616 cold ACSF using a Vibroslice<sup>TM</sup> (Campden Instruments). Chemicals were obtained from  
617 Sigma Aldrich unless stated otherwise. ACSF contained in mM: 125 NaCl, 25 NaHCO<sub>3</sub>, 2.5  
618 KCl, 1.25 NaH<sub>2</sub>PO<sub>4</sub>, 2 CaCl<sub>2</sub>, 2 MgCl<sub>2</sub> and 25 glucose, and was gassed with Carbogen (95%  
619 O<sub>2</sub>, 5% CO<sub>2</sub>, pH 7.4, osmolarity was 300 - 310 mOsm/kg). Slices were allowed to recover for  
620 30 min at room temperature (22-25°C) before use for electrophysiology. Recordings were

621 carried out in a modified ACSF solution containing in mM: 125 NaCl, 25 NaHCO<sub>3</sub>, 2.5 KCl,  
622 1.25 NaH<sub>2</sub>PO<sub>4</sub>, 2.058 MgCl<sub>2</sub>, 1.8 CaCl<sub>2</sub>, 2.5 glucose, 5 CsCl, 15 tetraethylammonium, 2.5 4-  
623 aminopyridine, 600 nM TTX (Tocris), 20 μM CNQX (Tocris), 4 μM SR 95531 (Tocris) and 10  
624 μM DL-AP5 (Tocris), pH adjusted to 7.4, osmolarity was 300 - 315 mOsm/kg. Data were  
625 digitalised with 2 kHz, and filtered with Bessel Filter 1: 10 kHz; Bessel Filter 2: 5 kHz. All  
626 recordings were performed at a bath temperature of 33°C ± 1. Patch pipettes (2.5-3.5 MΩ)  
627 were filled with internal solution containing in mM: 180 N-Methyl-D-glucamine, 40 HEPES, 0.1  
628 EGTA, 4 MgCl<sub>2</sub>, 5 Na-ATP, 1 Lithium-GTP, 0.1% neurobiotin tracer (Vector Laboratories); pH  
629 was adjusted to 7.35 with H<sub>2</sub>SO<sub>4</sub>, osmolarity was 285 - 295 mOsm/kg. Neurons were filled with  
630 neurobiotin during the recording, fixed with a 4% PFA solution and stained for tyrosine  
631 hydroxylase (TH; rabbit anti-TH, 1:1000, Cat#: 657012, Merck Millipore) and neurobiotin  
632 (Streptavidin Alexa Fluor conjugate 647, 1:1000, Cat# S21374, Thermo Fisher Scientific). Only  
633 TH and neurobiotin positive cells were used for the statistical analysis.

634 Steady-state activation was measured by applying 150 ms depolarizing square pulses to  
635 various test potentials (10 mV increments) starting from -90 mV with a 10 sec interpulse  
636 interval. Holding potential between the pulses was -100 mV. Voltage at maximal Ca<sup>2+</sup> current  
637 amplitude ( $V_{max}$ ) was determined during the steady-state activation recordings. Voltage-  
638 dependence of the steady-state inactivation was measured by applying a 20 ms control test  
639 pulse (from holding potential -100 mV to  $V_{max}$ ) followed by 5 s conditioning steps to various  
640 potentials (10 mV increments) and a subsequent 20 ms test pulse to  $V_{max}$  with a 10 sec  
641 interpulse interval. Inactivation was calculated as the ratio between the current amplitudes of  
642 the test versus control pulse. Currents were leak subtracted on-line using the P/4 subtraction.  
643 The series resistance was compensated by 60-90%. Data were not corrected for liquid junction  
644 potential (-5 mV, measured according to Neher, 1992). Midbrain slices were preincubated  
645 (bath-perfusion) at least 30 min in T-type (10 μM Z941), L-type (1 μM isradipine, ISR), N- and  
646 P/Q-type (1 μM ω-conotoxin-MVIIIC) or R-type (100 nM SNX-482) Ca<sup>2+</sup> channel blockers;  
647 except Z941, which was kindly obtained from T. Snutch (University of British Columbia,  
648 Canada), all Cav Blocker were from Tocris.

649 Steady-state activation and inactivation curves were fitted as described above.

### 650 **Perforated patch recordings in SN DA neurons**

651 Brain slice preparation was performed as described in Supplemental Methods. After  
652 preparation, brain slices were transferred to a recording chamber (~1.5 ml volume) and initially  
653 superfused with carbogenated ACSF at a flow rate of ~2 ml/min. During the perforation  
654 process, the electrophysiological identification of the neuron was performed in current clamp  
655 mode. Afterwards, the ACSF was exchanged for the Ca<sup>2+</sup> current recording solution which  
656 contained in mM: 66.5 NaCl, 2 MgCl<sub>2</sub>, 3 CaCl<sub>2</sub>, 21 NaHCO<sub>3</sub>, 10 HEPES, 5 Glucose adjusted

657 to pH 7.2 (with HCl). Sodium currents were blocked by 1  $\mu$ M tetrodotoxin (TTX). Potassium  
658 currents and the hyperpolarization-activated cyclic nucleotide-gated cation current ( $I_h$ ) were  
659 blocked by: 40 mM TEA-Cl, 0.4 mM 4-AP, 1  $\mu$ M M phrixotoxin-2 (Alomone, Cat # STP-710;  
660 Subramaniam et al., 2014) and 20 mM CsCl. Experiments were carried out at  $\sim$ 28°C.  
661 Recordings were performed with an EPC10 amplifier (HEKA, Lambrecht, Germany) controlled  
662 by the software PatchMaster (version 2.32; HEKA). In parallel, data were sampled at 10 kHz  
663 with a CED 1401 using Spike2 (version 7) (both Cambridge Electronic Design, UK) and low-  
664 pass filtered at 2 kHz with a four-pole Bessel filter. The liquid junction potential between  
665 intracellular and extracellular solution was compensated (12 mV; calculated with Patcher's  
666 Power Tools plug-in for Igor Pro 6 (Wavemetrics, Portland, OR, USA)).

667 Perforated patch recordings were performed using protocols modified from (Horn & Marty,  
668 1988) and (Akaike & Harata, 1994). Electrodes with tip resistances between 2 and 4 M $\Omega$  were  
669 fashioned from borosilicate glass (0.86 mm inner diameter; 1.5 mm outer diameter; GB150-  
670 8P; Science Products) with a vertical pipette puller (PP-830; Narishige, London, UK). Patch  
671 recordings were performed with ATP and GTP free pipette solution containing (in mM): 138  
672 Cs-methanesulfonate, 10 CsCl<sub>2</sub>, 2 MgCl<sub>2</sub>, 10 HEPES and adjusted to pH 7.2 (with CsOH). ATP  
673 and GTP were omitted from the intracellular solution to prevent uncontrolled permeabilization  
674 of the cell membrane (Lindau & Fernandez, 1986). The patch pipette was tip filled with internal  
675 solution and back filled with 0.02% tetraethylrhodamine-dextran (D3308, Invitrogen, Eugene,  
676 OR, USA) and amphotericin-containing internal solution ( $\sim$ 400  $\mu$ g/ml; G4888; Sigma-Aldrich,  
677 Taufkirchen, Germany) to achieve perforated patch recordings. Amphotericin was dissolved in  
678 dimethyl sulfoxide (final concentration: 0.2 - 0.4%; DMSO; D8418, Sigma-Aldrich) (Rae et al.,  
679 1991), and was added to the modified pipette solution shortly before use. The used DMSO  
680 concentration had no obvious effect on the investigated neurons. During the recordings access  
681 resistance ( $R_a$ ) was constantly monitored and experiments were started after  $R_a$  was < 20M $\Omega$ .  
682 In the analyzed recordings  $R_a$  was comparable, did not change significantly over recording  
683 time, and was not significantly different between the distinct experimental groups. A change to  
684 the whole-cell configuration was indicated by a sudden change in  $R_a$  and diffusion of  
685 tetraethylrhodamine-dextran into the neuron. Such experiments were rejected. GABAergic and  
686 glutamatergic synaptic input was reduced by addition of 0.4 mM picrotoxin (P1675; Sigma-  
687 Aldrich), 50  $\mu$ M D-AP5 (A5282; Sigma-Aldrich), and 10  $\mu$ M CNQX (C127; Sigma-Aldrich) to  
688 the ACSF. For inhibition experiments, 100 nM SNX-482 (Alomone, Cat # RTS-500 dissolved  
689 in ACSF) or 10  $\mu$ M nifedipine (Alomone, Cat # N-120 diluted into ACSF from a freshly prepared  
690 10 mM stock solution in DMSO) was bath applied (in ACSF).

## 691 **Identification of $\beta$ -subunit transcripts in identified SN DA and VTA DA neurons**

### 692 **RNAScope *in situ* hybridization**

693 *In situ* hybridization experiments were performed on fresh frozen mouse brain tissue using the  
694 RNAScope® technology (Advanced Cell Diagnostics, ACD), according to the manufacturer's  
695 protocol under RNase-free conditions and essentially as described (Benkert et al., 2019).  
696 Briefly, 12 µm coronal cryosections were prepared (Duda et al., 2018), mounted on  
697 SuperFrost® Plus glass slides, and dried for one hour at -20°C. Directly before starting the  
698 RNAScope procedure, sections were fixed with 4% PFA for 15 min at 4°C and dehydrated  
699 using an increasing ethanol series (50%, 75%, 100%, 100%), for 5 min each. After treatment  
700 with protease IV (ACD, Cat# 322336) for 30 min at room temperature, sections were hybridized  
701 with the respective target probes for 2 h at 40°C in a HybEZ II hybridization oven (ACD). Target  
702 probe signals were amplified using the RNAScope Fluorescent Multiplex Detection Kit (ACD,  
703 Cat# 320851). All amplifier solutions were dropped on respective sections, incubated at 40°C  
704 in the HybEZ hybridization oven, and washed twice with wash buffer (ACD) between each  
705 amplification step for 2 min each. Nuclei were counterstained with DAPI ready-to-use solution  
706 (ACD, included in Kit) and slides were coverslipped with HardSet mounting medium  
707 (VectaShield, Cat# H-1400) and dried overnight. Target probes were either obtained from the  
708 library of validated probes provided by Advanced Cell Diagnostics (ACD) or self-designed in  
709 cooperation with ACD. Target probes and image acquisition are described in Supplemental  
710 Methods.

#### 711 **Multiplex-nested PCR, qualitative and quantitative PCR analysis in individual laser-** 712 **microdissected DA neurons**

713 Cryosectioning, UV-laser microdissection (UV-LMD) and reverse transcription as well as  
714 multiplex-nested PCR, qualitative and quantitative PCR analysis were carried out similarly as  
715 previously described in detail (Benkert et al., 2019; Duda et al., 2018; Grundemann et al., 2011;  
716 Simons et al., 2019). All cDNA samples were precipitated prior to PCR, as described (Liss,  
717 2002). More details are given in Supplemental Methods.

#### 718 **Statistics**

719 Data were analyzed using Clampfit 10.7 (Axon Instruments), Microsoft Excel, SigmaPlot 14.0  
720 (Systat Software, Inc), and GraphPad Prism 5 or 7.04 software (GraphPad software, Inc). Data  
721 were analyzed by appropriate statistical testing as indicated in detail for all experiments in the  
722 text, figure and table legends. Statistical significance was set at  $p < 0.05$ . Brain slice patch-  
723 clamp data were also analyzed with FitMaster (v2x90.5, HEKA Elektronik). RNAScope and  
724 single-cell RT-qPCR data data were analyzed by Fiji (<https://imagej.net/Fiji>), QuantStudio™  
725 Design and Analysis Software (Applied Biosystems) and GraphPad Prism 7.04. All values are  
726 presented as mean  $\pm$  SEM for the indicated number of experiments (n) unless stated  
727 otherwise.

728

729 **Acknowledgements**

730 This work was supported by the Austrian Science Fund (FWF, P27809, W1101, CavX-DOC  
731 30 doc.fund) and the Tyrolean Science Fund (TWF, UNI-0404/2345), by the Italian Miur  
732 (2015FNWP34) and by the Compagnia di San Paolo (CSTO165284). We thank Dr. Veit  
733 Flockerzi for cDNA of  $\beta 2$  splice variants, and Jennifer Müller and Gospava Stojanovic for expert  
734 technical assistance.

735

736 **Author Contributions Statement**

737 JS, NJO, and AS designed the study, AS performed electrophysiological recordings in tsA-201  
738 cells, EMF dissected SN and VTA tissue, NTH prepared cDNA from mouse tissue, NTH and  
739 KV performed RT-qPCR analyses, NW performed RNAScope experiments, JB, JD performed  
740 SN DA neuron Cav2.3 splice variant analysis, JD, DS performed UV-LMD and single-cell RT-  
741 qPCR, AG, CP performed whole cell patch clamp recordings of SN DA neurons from acute  
742 mouse brain slices; GT performed electrophysiological recordings and VC and EC designed,  
743 analyzed and interpreted the experiments of AP and Cav current recordings in cultured  
744 neurons; PK and SH performed recordings in SN DA neurons in slices, JS, NJO and AS  
745 prepared the manuscript and all authors reviewed and revised the final manuscript.

746

747 **Competing interests**

748 The authors declare that they have no financial and non-financial competing interests.



749 **References**

750

751 Akaike, N., & Harata, N. (1994). Nystatin perforated patch recording and its applications to  
752 analyses of intracellular mechanisms. *Jpn J Physiol*, *44*(5), 433-473.

753 <https://doi.org/10.2170/jjphysiol.44.433>

754 Almog, M., & Korngreen, A. (2009). Characterization of voltage-gated Ca(2+) conductances  
755 in layer 5 neocortical pyramidal neurons from rats. *PLoS One*, *4*(4), e4841.

756 <https://doi.org/10.1371/journal.pone.0004841>

757 Baldelli, P., Hernandez-Guijo, J. M., Carabelli, V., & Carbone, E. (2005). Brain-derived  
758 neurotrophic factor enhances GABA release probability and nonuniform distribution of  
759 N- and P/Q-type channels on release sites of hippocampal inhibitory synapses. *J*  
760 *Neurosci*, *25*(13), 3358-3368. <https://doi.org/10.1523/JNEUROSCI.4227-04.2005>

761

762 Benkert, J., Hess, S., Roy, S., Beccano-Kelly, D., Wiederspohn, N., Duda, J., Simons, C.,  
763 Patil, K., Gaifullina, A., Mannal, N., Dragicevic, E., Spaich, D., Müller, S., Nemeth, J.,  
764 Hollmann, H., Deuter, N., Mousba, Y., Kubisch, C., Poetschke, C., Striessnig, J.,  
765 Pongs, O., Schneider, T., Wade-Martins, R., Patel, S., Parlato, R., Frank, T.,  
766 Kloppenburg, P., & Liss, B. (2019). Cav2.3 channels contribute to dopaminergic  
767 neuron loss in a model of Parkinson's disease. *Nature Communications*, *10*(1), 5094.  
768 <https://doi.org/10.1038/s41467-019-12834-x>

769 Biglan, K. M., Oakes, D., Lang, A. E., Hauser, R. A., Hodgeman, K., Greco, B., Lowell, J.,  
770 Rockhill, R., Shoulson, I., Venuto, C., Young, D., Simuni, T., & Investigators, P. S. G.  
771 S. P. I. (2017). A novel design of a Phase III trial of isradipine in early Parkinson  
772 disease (STEADY-PD III). *Ann Clin Transl Neurol*, *4*, 360-368.  
773 <https://doi.org/10.1002/acn3.412>

774 Bijlmakers, M. J., & Marsh, M. (2003). The on-off story of protein palmitoylation. *Trends Cell*  
775 *Biol*, *13*(1), 32-42.

776 Bolam, J. P., & Pissadaki, E. K. (2012). Living on the edge with too many mouths to feed:  
777 why dopamine neurons die. *Mov Disord*, *27*, 1478-1483.

778 <https://doi.org/10.1002/mds.25135>

779 Bourinet, E., Stotz, S. C., Spaetgens, R. L., Dayanithi, G., Lemos, J., Nargeot, J., & Zamponi,  
780 G. W. (2001). Interaction of SNX482 with domains III and IV inhibits activation gating  
781 of alpha(1E) (Ca(V)2.3) calcium channels. *Biophys J*, *81*(1), 79-88.

782 [https://doi.org/10.1016/s0006-3495\(01\)75681-0](https://doi.org/10.1016/s0006-3495(01)75681-0)

783 Branch, S. Y., Sharma, R., & Beckstead, M. J. (2014). Aging decreases L-type calcium  
784 channel currents and pacemaker firing fidelity in substantia nigra dopamine neurons.  
785 *J Neurosci*, *34*, 9310-9318. <https://doi.org/10.1523/JNEUROSCI.4228-13.2014>

- 786 Brichta, L., Shin, W., Jackson-Lewis, V., Blesa, J., Yap, E. L., Walker, Z., Zhang, J.,  
787 Roussarie, J. P., Alvarez, M. J., Califano, A., Przedborski, S., & Greengard, P. (2015).  
788 Identification of neurodegenerative factors using translome-regulatory network  
789 analysis. *Nat Neurosci*, *18*(9), 1325-1333. <https://doi.org/10.1038/nn.4070>
- 790 Buraei, Z., & Yang, J. (2010). The  $\beta$  subunit of voltage-gated  $\text{Ca}^{2+}$  channels. *Physiol Rev*,  
791 *90*(4), 1461-1506. <https://doi.org/10.1152/physrev.00057.2009>
- 792 Burbulla, L. F., Song, P., Mazzulli, J. R., Zampese, E., Wong, Y. C., Jeon, S., Santos, D. P.,  
793 Blanz, J., Obermaier, C. D., Strojny, C., Savas, J. N., Kiskinis, E., Zhuang, X., Kruger,  
794 R., Surmeier, D. J., & Krainc, D. (2017). Dopamine oxidation mediates mitochondrial  
795 and lysosomal dysfunction in Parkinson's disease. *Science*, *357*(6357), 1255-1261.  
796 <https://doi.org/10.1126/science.aam9080>
- 797 Damier, P., Hirsch, E. C., Agid, Y., & Graybiel, A. M. (1999). The substantia nigra of the  
798 human brain. II. Patterns of loss of dopamine-containing neurons in Parkinson's  
799 disease. *Brain*, *122* ( Pt 8), 1437-1448.  
800 <http://www.ncbi.nlm.nih.gov/pubmed/10430830>
- 801 Dragicevic, E., Schiemann, J., & Liss, B. (2015). Dopamine midbrain neurons in health and  
802 Parkinson's disease: Emerging roles of voltage-gated calcium channels and ATP-  
803 sensitive potassium channels. *Neuroscience*, *284*, 798-814.  
804 <https://doi.org/10.1016/j.neuroscience.2014.10.037>
- 805 Duda, J., Fauler, M., Grundemann, J., & Liss, B. (2018). Cell-Specific RNA Quantification in  
806 Human SN DA Neurons from Heterogeneous Post-mortem Midbrain Samples by UV-  
807 Laser Microdissection and RT-qPCR. *Methods Mol Biol*, *1723*, 335-360.  
808 [https://doi.org/10.1007/978-1-4939-7558-7\\_19](https://doi.org/10.1007/978-1-4939-7558-7_19)
- 809 Etemad, S., Obermair, G. J., Bindreither, D., Benedetti, A., Stanika, R., Di Biase, V.,  
810 Burtscher, V., Koschak, A., Kofler, R., Geley, S., Wille, A., Lusser, A., Flockerzi, V., &  
811 Flucher, B. E. (2014). Differential neuronal targeting of a new and two known calcium  
812 channel  $\beta 4$  subunit splice variants correlates with their regulation of gene expression.  
813 *The Journal of Neuroscience: The Official Journal of the Society for Neuroscience*,  
814 *34*, 1446-1461. <https://doi.org/10.1523/JNEUROSCI.3935-13.2014>
- 815 Evans, R. C., Zhu, M., & Khaliq, Z. M. (2017). Dopamine Inhibition Differentially Controls  
816 Excitability of Substantia Nigra Dopamine Neuron Subpopulations through T-Type  
817 Calcium Channels. *J Neurosci*, *37*(13), 3704-3720.  
818 <https://doi.org/10.1523/JNEUROSCI.0117-17.2017>
- 819 Gantz, S. C., Ford, C. P., Morikawa, H., & Williams, J. T. (2018). The Evolving Understanding  
820 of Dopamine Neurons in the Substantia Nigra and Ventral Tegmental Area. *Annu Rev*  
821 *Physiol*, *80*, 219-241. <https://doi.org/10.1146/annurev-physiol-021317-121615>

- 822 Gavello, D., Calorio, C., Franchino, C., Cesano, F., Carabelli, V., Carbone, E., & Marcantoni,  
823 A. (2018). Early Alterations of Hippocampal Neuronal Firing Induced by Abeta42.  
824 *Cereb Cortex*, 28(2), 433-446. <https://doi.org/10.1093/cercor/bhw377>
- 825 Gebhart, M., Juhasz-Vedres, G., Zuccotti, A., Brandt, N., Engel, J., Trockenbacher, A., Kaur,  
826 G., Obermair, G. J., Knipper, M., Koschak, A., & Striessnig, J. (2010). Modulation of  
827 Cav1.3 Ca<sup>2+</sup> channel gating by Rab3 interacting molecule [Research Support, Non-  
828 U.S. Gov't]. *Mol Cell Neurosci*, 44(3), 246-259.  
829 <https://doi.org/10.1016/j.mcn.2010.03.011>
- 830 Giguère, N., Burke Nanni, S., & Trudeau, L. E. (2018). On Cell Loss and Selective  
831 Vulnerability of Neuronal Populations in Parkinson's Disease. *Front Neurol*, 9, 455.  
832 <https://doi.org/10.3389/fneur.2018.00455>
- 833 Grace, A. A., & Bunney, B. S. (1984a). The control of firing pattern in nigral dopamine  
834 neurons: burst firing. *J Neurosci*, 4(11), 2877-2890.
- 835 Grace, A. A., & Bunney, B. S. (1984b). The control of firing pattern in nigral dopamine  
836 neurons: single spike firing. *J Neurosci*, 4, 2866-2876.
- 837 Grundemann, J., Schlaudraff, F., & Liss, B. (2011). UV-laser microdissection and mRNA  
838 expression analysis of individual neurons from postmortem Parkinson's disease  
839 brains. *Methods Mol Biol*, 755, 363-374. [https://doi.org/10.1007/978-1-61779-163-](https://doi.org/10.1007/978-1-61779-163-5_30)  
840 [5\\_30](https://doi.org/10.1007/978-1-61779-163-5_30)
- 841 Guarina, L., Calorio, C., Gavello, D., Moreva, E., Traina, P., Battiato, A., Ditalia Tchernij, S.,  
842 Forneris, J., Gai, M., Picollo, F., Olivero, P., Genovese, M., Carbone, E., Marcantoni,  
843 A., & Carabelli, V. (2018). Nanodiamonds-induced effects on neuronal firing of mouse  
844 hippocampal microcircuits. *Sci Rep*, 8(1), 2221. [https://doi.org/10.1038/s41598-018-](https://doi.org/10.1038/s41598-018-20528-5)  
845 [20528-5](https://doi.org/10.1038/s41598-018-20528-5)
- 846 Guzman, J. N., Ilijic, E., Yang, B., Sanchez-Padilla, J., Wokosin, D., Galtieri, D., Kondapalli,  
847 J., Schumacker, P. T., & Surmeier, D. J. (2018). Systemic isradipine treatment  
848 diminishes calcium-dependent mitochondrial oxidant stress. *J Clin Invest*, 128(6),  
849 2266-2280. <https://doi.org/10.1172/JCI95898>
- 850 Guzman, J. N., Sanchez-Padilla, J., Chan, C. S., & Surmeier, D. J. (2009). Robust  
851 pacemaking in substantia nigra dopaminergic neurons. *J Neurosci*, 29(35), 11011-  
852 11019. <https://doi.org/10.1523/JNEUROSCI.2519-09.2009> [doi]
- 853 Hofer, N. T., Tuluc, P., Ortner, N. J., Nikonishyna, Y. V., Fernández-Quintero, M. L., Liedl, K.  
854 R., Flucher, B. E., Cox, H., & Striessnig, J. (2020). Biophysical classification of a  
855 CACNA1D de novo mutation as a high-risk mutation for a severe  
856 neurodevelopmental disorder. *Mol Autism*, 11, 4. [https://doi.org/10.1186/s13229-019-](https://doi.org/10.1186/s13229-019-0310-4)  
857 [0310-4](https://doi.org/10.1186/s13229-019-0310-4)

- 858 Horn, R., & Marty, A. (1988). Muscarinic activation of ionic currents measured by a new  
859 whole-cell recording method. *J Gen Physiol*, 92(2), 145-159.  
860 <https://doi.org/10.1085/jgp.92.2.145>
- 861 Jones, L. P., Wei, S. K., & Yue, D. T. (1998). Mechanism of auxiliary subunit modulation of  
862 neuronal alpha1E calcium channels. *J Gen Physiol*, 112(2), 125-143.  
863 <http://www.ncbi.nlm.nih.gov/pubmed/9689023>
- 864 Kepplinger, K. J., Forstner, G., Kahr, H., Leitner, K., Pammer, P., Groschner, K., Soldatov, N.  
865 M., & Romanin, C. (2000). Molecular determinant for run-down of L-type Ca<sup>2+</sup>  
866 channels localized in the carboxyl terminus of the 1C subunit. *J Physiol*, 529 Pt 1,  
867 119-130. <https://doi.org/10.1111/j.1469-7793.2000.00119.x>
- 868 Kim, J., Wei, D. S., & Hoffman, D. A. (2005). Kv4 potassium channel subunits control action  
869 potential repolarization and frequency-dependent broadening in rat hippocampal CA1  
870 pyramidal neurones. *J Physiol*, 569(Pt 1), 41-57.  
871 <https://doi.org/10.1113/jphysiol.2005.095042>
- 872 Kimm, T., & Bean, B. P. (2014). Inhibition of A-type potassium current by the peptide toxin  
873 SNX-482. *J Neurosci*, 34(28), 9182-9189. [https://doi.org/10.1523/JNEUROSCI.0339-](https://doi.org/10.1523/JNEUROSCI.0339-14.2014)  
874 [14.2014](https://doi.org/10.1523/JNEUROSCI.0339-14.2014)
- 875 Kiyonaka, S., Wakamori, M., Miki, T., Uriu, Y., Nonaka, M., Bito, H., Beedle, A. M., Mori, E.,  
876 Hara, Y., De Waard, M., Kanagawa, M., Itakura, M., Takahashi, M., Campbell, K. P.,  
877 & Mori, Y. (2007). RIM1 confers sustained activity and neurotransmitter vesicle  
878 anchoring to presynaptic Ca<sup>2+</sup> channels. *Nature neuroscience*, 10(6).  
879 <https://doi.org/10.1038/nn1904>
- 880 Koschak, A., Reimer, D., Huber, I., Grabner, M., Glossmann, H., Engel, J., & Striessnig, J.  
881 (2001). alpha 1D (Cav1.3) subunits can form L-type Ca<sup>2+</sup> channels activating at  
882 negative voltages. *J Biol Chem*, 276, 22100-22106.  
883 <https://doi.org/10.1074/jbc.M101469200>
- 884 Lieb, A., Ortner, N., & Striessnig, J. (2014). C-terminal modulatory domain controls coupling  
885 of voltage-sensing to pore opening in Cav1.3 L-type calcium channels. *Biophys J*,  
886 106(7), 1467-1475. <https://doi.org/10.1016/j.bpj.2014.02.017>
- 887 Lindau, M., & Fernandez, J. M. (1986). IgE-mediated degranulation of mast cells does not  
888 require opening of ion channels. *Nature*, 319(6049), 150-153.  
889 <https://doi.org/10.1038/319150a0>
- 890 Link, S., Meissner, M., Held, B., Beck, A., Weissgerber, P., Freichel, M., & Flockerzi, V.  
891 (2009). Diversity and developmental expression of L-type calcium channel beta2  
892 proteins and their influence on calcium current in murine heart. *J Biol Chem*, 284(44),  
893 30129-30137. <https://doi.org/10.1074/jbc.M109.045583>

- 894 Liss, B. (2002). Improved quantitative real-time RT-PCR for expression profiling of individual  
895 cells. *Nucleic Acids Res*, 30(17), e89. <https://doi.org/10.1093/nar/gnf088>
- 896 Liss, B., Franz, O., Sewing, S., Bruns, R., Neuhoff, H., & Roeper, J. (2001). Tuning  
897 pacemaker frequency of individual dopaminergic neurons by Kv4.3L and KChip3.1  
898 transcription. *EMBO J*, 20(20), 5715-5724. <https://doi.org/10.1093/emboj/20.20.5715>
- 899 Liss, B., & Striessnig, J. (2019). The Potential of L-Type Calcium Channels as a Drug Target  
900 for Neuroprotective Therapy in Parkinson's Disease. *Annu Rev Pharmacol Toxicol*,  
901 59, 263-289. <https://doi.org/10.1146/annurev-pharmtox-010818-021214>
- 902 Liu, H., De Waard, M., Scott, V. E. S., Gurnett, C. A., Lennon, V. A., & Campbell, K. P.  
903 (1996). Identification of three subunits of the high affinity omega-Conotoxin MVIIC-  
904 sensitive calcium channel. *J Biol Chem*, 271, 13804-13810.
- 905 Matsushita, N., Okada, H., Yasoshima, Y., Takahashi, K., Kiuchi, K., & Kobayashi, K. (2002).  
906 Dynamics of tyrosine hydroxylase promoter activity during midbrain dopaminergic  
907 neuron development. *J Neurochem*, 82(2), 295-304. <https://doi.org/10.1046/j.1471-4159.2002.00972.x>
- 908
- 909 Matt, L., Kim, K., Chowdhury, D., & Hell, J. W. (2019). Role of Palmitoylation of Postsynaptic  
910 Proteins in Promoting Synaptic Plasticity. *Front Mol Neurosci*, 12, 8.  
911 <https://doi.org/10.3389/fnmol.2019.00008>
- 912 Miranda-Laferte, E., Ewers, D., Guzman, R. E., Jordan, N., Schmidt, S., & Hidalgo, P.  
913 (2014). The N-terminal domain tethers the voltage-gated calcium channel beta2e-  
914 subunit to the plasma membrane via electrostatic and hydrophobic interactions. *J Biol*  
915 *Chem*, 289(15), 10387-10398. <https://doi.org/10.1074/jbc.M113.507244>
- 916 Miranda-Laferte, E., Schmidt, S., Jara, A. C., Neely, A., & Hidalgo, P. (2012). A short  
917 polybasic segment between the two conserved domains of the beta2a-subunit  
918 modulates the rate of inactivation of R-type calcium channel. *J Biol Chem*, 287(39),  
919 32588-32597. <https://doi.org/10.1074/jbc.M112.362509>
- 920 Morgenstern, T. J., Park, J., Fan, Q. R., & Colecraft, H. M. (2019). A potent voltage-gated  
921 calcium channel inhibitor engineered from a nanobody targeted to auxiliary CaVbeta  
922 subunits. *eLife*, 8. <https://doi.org/10.7554/eLife.49253>
- 923 Nakashima, Y. M., Todorovic, S. M., Pereverzev, A., Hescheler, J., Schneider, T., & Lingle,  
924 C. J. (1998). Properties of Ba<sup>2+</sup> currents arising from human alpha1E and  
925 alpha1Ebeta3 constructs expressed in HEK293 cells: physiology, pharmacology, and  
926 comparison to native T-type Ba<sup>2+</sup> currents. *Neuropharmacology*, 37(8), 957-972.  
927 [https://doi.org/10.1016/s0028-3908\(98\)00097-5](https://doi.org/10.1016/s0028-3908(98)00097-5)
- 928 Neher, E. (1992). Correction for liquid junction potentials in patch clamp experiments.  
929 *Methods Enzymol*, 207, 123-131. [https://doi.org/10.1016/0076-6879\(92\)07008-c](https://doi.org/10.1016/0076-6879(92)07008-c)

- 930 Newcomb, R., Szoke, B., Palma, A., Wang, G., Chen, X., Hopkins, W., Cong, R., Miller, J.,  
931 Urge, L., Tarczy-Hornoch, K., Loo, J. A., Dooley, D. J., Nadasdi, L., Tsien, R. W.,  
932 Lemos, J., & Miljanich, G. (1998). Selective peptide antagonist of the class E calcium  
933 channel from the venom of the tarantula *Hysterocrates gigas*. *Biochemistry*, *37*(44),  
934 15353-15362.
- 935 Ortner, N. J., Bock, G., Dougalis, A., Kharitonova, M., Duda, J., Hess, S., Tuluc, P.,  
936 Pomberger, T., Stefanova, N., Pitterl, F., Ciossek, T., Oberacher, H., Draheim, H. J.,  
937 Kloppenburg, P., Liss, B., & Striessnig, J. (2017). Lower Affinity of Isradipine for L-  
938 Type Ca(2+) Channels during Substantia Nigra Dopamine Neuron-Like Activity:  
939 Implications for Neuroprotection in Parkinson's Disease. *J Neurosci*, *37*(28), 6761-  
940 6777. <https://doi.org/10.1523/JNEUROSCI.2946-16.2017>
- 941 Ortner, N. J., Bock, G., Vandael, D. H., Mauersberger, R., Draheim, H. J., Gust, R., Carbone,  
942 E., Tuluc, P., & Striessnig, J. (2014). Pyrimidine-2,4,6-triones are a new class of  
943 voltage-gated L-type Ca<sup>2+</sup> channel activators. *Nat Commun*, *5*, 3897.  
944 <https://doi.org/10.1038/ncomms4897>
- 945 Ortner, N. J., Pinggera, A., Hofer, N. T., Siller, A., Brandt, N., Raffener, A., Vilusic, K., Lang,  
946 I., Blum, K., Obermair, G. J., Stefan, E., Engel, J., & Striessnig, J. (2020). RBP2  
947 stabilizes slow Cav1.3 Ca<sup>2+</sup> channel inactivation properties of cochlear inner hair  
948 cells. *Pflügers Archiv: European Journal of Physiology*, *472*(1), 3-25.  
949 <https://doi.org/10.1007/s00424-019-02338-4>
- 950 Ortner, N. J., Pinggera, A., Hofer, N. T., Siller, A., Brandt, N., Raffener, A., Vilusic, K., Lang,  
951 I., Blum, K., Obermair, G. J., Stefan, E., Engel, J., & Striessnig, J. (2020). RBP2  
952 stabilizes slow Cav1.3 Ca(2+) channel inactivation properties of cochlear inner hair  
953 cells. *Pflugers Arch*, *472*(1), 3-25. <https://doi.org/10.1007/s00424-019-02338-4>
- 954 Paladini, C. A., & Roeper, J. (2014). Generating bursts (and pauses) in the dopamine  
955 midbrain neurons. *Neuroscience*, *282*, 109-121.  
956 <https://doi.org/10.1016/j.neuroscience.2014.07.032>
- 957 Parkinson Study Group, S.-P. D. I. I. I. I. (2020). Isradipine Versus Placebo in Early  
958 Parkinson Disease: A Randomized Trial. *Ann Intern Med*, *172*(9), 591-598.  
959 <https://doi.org/10.7326/M19-2534>
- 960 Pereverzev, A., Leroy, J., Krieger, A., Malecot, C. O., Hescheler, J., Pfitzer, G., Klockner, U.,  
961 & Schneider, T. (2002). Alternate splicing in the cytosolic II-III loop and the carboxy  
962 terminus of human E-type voltage-gated Ca(2+) channels: electrophysiological  
963 characterization of isoforms. *Mol Cell Neurosci*, *21*(2), 352-365.  
964 <https://doi.org/10.1006/mcne.2002.1179>

- 965 Philippart, F., Destreel, G., Merino-Sepúlveda, P., Henny, P., Engel, D., & Seutin, V. (2016).  
966 Differential Somatic Ca<sup>2+</sup> Channel Profile in Midbrain Dopaminergic Neurons. *J*  
967 *Neurosci*, 36, 7234-7245. <https://doi.org/10.1523/JNEUROSCI.0459-16.2016>
- 968 Pruszek, J., Just, L., Isacson, O., & Nikkhah, G. (2009). Isolation and culture of ventral  
969 mesencephalic precursor cells and dopaminergic neurons from rodent brains. *Curr*  
970 *Protoc Stem Cell Biol*, Chapter 2, Unit 2D.5.  
971 <https://doi.org/10.1002/9780470151808.sc02d05s11>
- 972 Puopolo, M., Raviola, E., & Bean, B. P. (2007). Roles of subthreshold calcium current and  
973 sodium current in spontaneous firing of mouse midbrain dopamine neurons. *J*  
974 *Neurosci*, 27(3), 645-656. <https://doi.org/10.1523/JNEUROSCI.4341-06.2007>
- 975 Qin, N., Platano, D., Olcese, R., Costantin, J. L., Stefani, E., & Birnbaumer, L. (1998). Unique  
976 regulatory properties of the type 2a Ca<sup>2+</sup> channel beta subunit caused by  
977 palmitoylation. *Proceedings of the National Academy of Sciences of the United States*  
978 *of America*, 95(8), 4690-4695.
- 979 Rae, J., Cooper, K., Gates, P., & Watsky, M. (1991). Low access resistance perforated patch  
980 recordings using amphotericin B. *J Neurosci Methods*, 37(1), 15-26.  
981 [https://doi.org/10.1016/0165-0270\(91\)90017-t](https://doi.org/10.1016/0165-0270(91)90017-t)
- 982 Randall, A. D., & Tsien, R. W. (1997). Contrasting biophysical and pharmacological  
983 properties of T-type and R-type calcium channels. *Neuropharmacology*, 36(7), 879-  
984 893. [https://doi.org/10.1016/s0028-3908\(97\)00086-5](https://doi.org/10.1016/s0028-3908(97)00086-5)
- 985 Robinson, B. G., Cai, X., Wang, J., Bunzow, J. R., Williams, J. T., & Kaeser, P. S. (2019).  
986 RIM is essential for stimulated but not spontaneous somatodendritic dopamine  
987 release in the midbrain. *eLife*, 8, e47972. <https://doi.org/10.7554/eLife.47972>
- 988 Sawamoto, K., Nakao, N., Kobayashi, K., Matsushita, N., Takahashi, H., Kakishita, K.,  
989 Yamamoto, A., Yoshizaki, T., Terashima, T., Murakami, F., Itakura, T., & Okano, H.  
990 (2001). Visualization, direct isolation, and transplantation of midbrain dopaminergic  
991 neurons. *Proc Natl Acad Sci U S A*, 98(11), 6423-6428.  
992 <https://doi.org/10.1073/pnas.111152398>
- 993 Schiemann, J., Schlaudraff, F., Klose, V., Bingmer, M., Seino, S., Magill, P. J., Zaghloul, K.  
994 A., Schneider, G., Liss, B., & Roeper, J. (2012). K-ATP channels in dopamine  
995 substantia nigra neurons control bursting and novelty-induced exploration. *Nat*  
996 *Neurosci*, 15(9), 1272-1280. <https://doi.org/10.1038/nn.3185>
- 997 Schlick, B., Flucher, B. E., & Obermair, G. J. (2010). Voltage-activated calcium channel  
998 expression profiles in mouse brain and cultured hippocampal neurons. *Neuroscience*,  
999 167(3), 786-798. <https://doi.org/10.1016/j.neuroscience.2010.02.037>

- 1000 Schneider, T., Alpdogan, S., Hescheler, J., & Neumaier, F. (2018). In vitro and in vivo  
1001 phosphorylation of the Cav2.3 voltage-gated R-type calcium channel. *Channels*  
1002 (*Austin*), 12(1), 326-334. <https://doi.org/10.1080/19336950.2018.1516984>
- 1003 Schneider, T., Dibue, M., & Hescheler, J. (2013). How "Pharmacoresistant" is Cav2.3, the  
1004 Major Component of Voltage-Gated R-type Ca<sup>2+</sup> Channels? *Pharmaceuticals*  
1005 (*Basel*), 6(6), 759-776. <https://doi.org/10.3390/ph6060759>
- 1006 Scott, V. E., De Waard, M., Liu, H., Gurnett, C. A., Venzke, D. P., Lennon, V. A., & Campbell,  
1007 K. P. (1996). Beta subunit heterogeneity in N-type Ca<sup>2+</sup> channels. *J Biol Chem*,  
1008 271(6), 3207-3212.
- 1009 Shin, W. (2015). *RNASeq of DA neurons from SNpc and VTA. Dataset posted on*  
1010 *04.03.2015, 16:01 by William Shin.*  
1011 [https://figshare.com/articles/RNASeq\\_of\\_DA\\_neurons\\_from\\_SNpc\\_and\\_VTA/926519](https://figshare.com/articles/RNASeq_of_DA_neurons_from_SNpc_and_VTA/926519)
- 1012 Simons, C., Benkert, J., Deuter, N., Poetschke, C., Pongs, O., Schneider, T., Duda, J., &  
1013 Liss, B. (2019). NCS-1 Deficiency Affects mRNA Levels of Genes Involved in  
1014 Regulation of ATP Synthesis and Mitochondrial Stress in Highly Vulnerable  
1015 Substantia nigra Dopaminergic Neurons. *Front Mol Neurosci*, 12, 252.  
1016 <https://doi.org/10.3389/fnmol.2019.00252>
- 1017 Sochivko, D., Pereverzev, A., Smyth, N., Gissel, C., Schneider, T., & Beck, H. (2002). The  
1018 Ca(V)2.3 Ca(2+) channel subunit contributes to R-type Ca(2+) currents in murine  
1019 hippocampal and neocortical neurones. *J Physiol*, 542(Pt 3), 699-710.
- 1020 Soong, T. W., Stea, A., Hodson, C. D., Dubel, S. J., Vincent, S. R., & Snutch, T. P. (1993).  
1021 Structure and functional expression of a member of the low voltage-activated calcium  
1022 channel family. *Science*, 260, 1133-1136.
- 1023 Subramaniam, M., Althof, D., Gispert, S., Schwenk, J., Auburger, G., Kulik, A., Fakler, B., &  
1024 Roeper, J. (2014). Mutant  $\alpha$ -synuclein enhances firing frequencies in dopamine  
1025 substantia nigra neurons by oxidative impairment of A-type potassium channels. *The*  
1026 *Journal of Neuroscience: The Official Journal of the Society for Neuroscience*, 34,  
1027 13586-13599. <https://doi.org/10.1523/JNEUROSCI.5069-13.2014>
- 1028 Surmeier, D. J., Guzman, J. N., Sanchez-Padilla, J., & Goldberg, J. A. (2011). The origins of  
1029 oxidant stress in Parkinson's disease and therapeutic strategies. *Antioxid Redox*  
1030 *Signal*, 14(7), 1289-1301. <https://doi.org/10.1089/ars.2010.3521>
- 1031 Surmeier, D. J., Obeso, J. A., & Halliday, G. M. (2017). Selective neuronal vulnerability in  
1032 Parkinson disease. *Nat Rev Neurosci*, 18, 101-113.  
1033 <https://doi.org/10.1038/nrn.2016.178>
- 1034 Tomagra, G., Picollo, F., Battiato, A., Picconi, B., De Marchis, S., Pasquarelli, A., Olivero, P.,  
1035 Marcantoni, A., Calabresi, P., Carbone, E., & Carabelli, V. (2019). Quantal Release of  
1036 Dopamine and Action Potential Firing Detected in Midbrain Neurons by



- 1037 Multifunctional Diamond-Based Microarrays. *Front Neurosci*, 13, 288.  
1038 <https://doi.org/10.3389/fnins.2019.00288>
- 1039 Tottene, A., Moretti, A., & Pietrobon, D. (1996). Functional diversity of P-type and R-type  
1040 calcium channels in rat cerebellar neurons. *J Neurosci*, 16(20), 6353-6363. 8815914  
1041
- 1042 Wang, G., Dayanithi, G., Newcomb, R., & Lemos, J. R. (1999). An R-type Ca(2+) current in  
1043 neurohypophysial terminals preferentially regulates oxytocin secretion. *J Neurosci*,  
1044 19(21), 9235-9241.
- 1045 Williams, M. E., Marubio, L. M., Deal, C. R., Hans, M., Brust, P. F., Philipson, L. H., Miller, R.  
1046 J., Johnson, E. C., Harpold, M. M., & Ellis, S. B. (1994). Structure and functional  
1047 characterization of neuronal alpha1E calcium channel subtypes. *J Biol Chem*, 269,  
1048 22347-22357.
- 1049 Xu, W., & Lipscombe, D. (2001). Neuronal Ca<sub>v</sub>1.3a1 L-type channels activate at relatively  
1050 hyperpolarized membrane potentials and are incompletely inhibited by  
1051 dihydropyridines. *J Neurosci*, 21(16), 5944-5951. 11487617
- 1052 Yasuda, T., Chen, L., Barr, W., McRory, J. E., Lewis, R. J., Adams, D. J., & Zamponi, G. W.  
1053 (2004). Auxiliary subunit regulation of high-voltage activated calcium channels  
1054 expressed in mammalian cells. *Eur J Neurosci*, 20(1), 1-13. 15245474  
1055  
1056

1057 **Figures and Tables**

1058

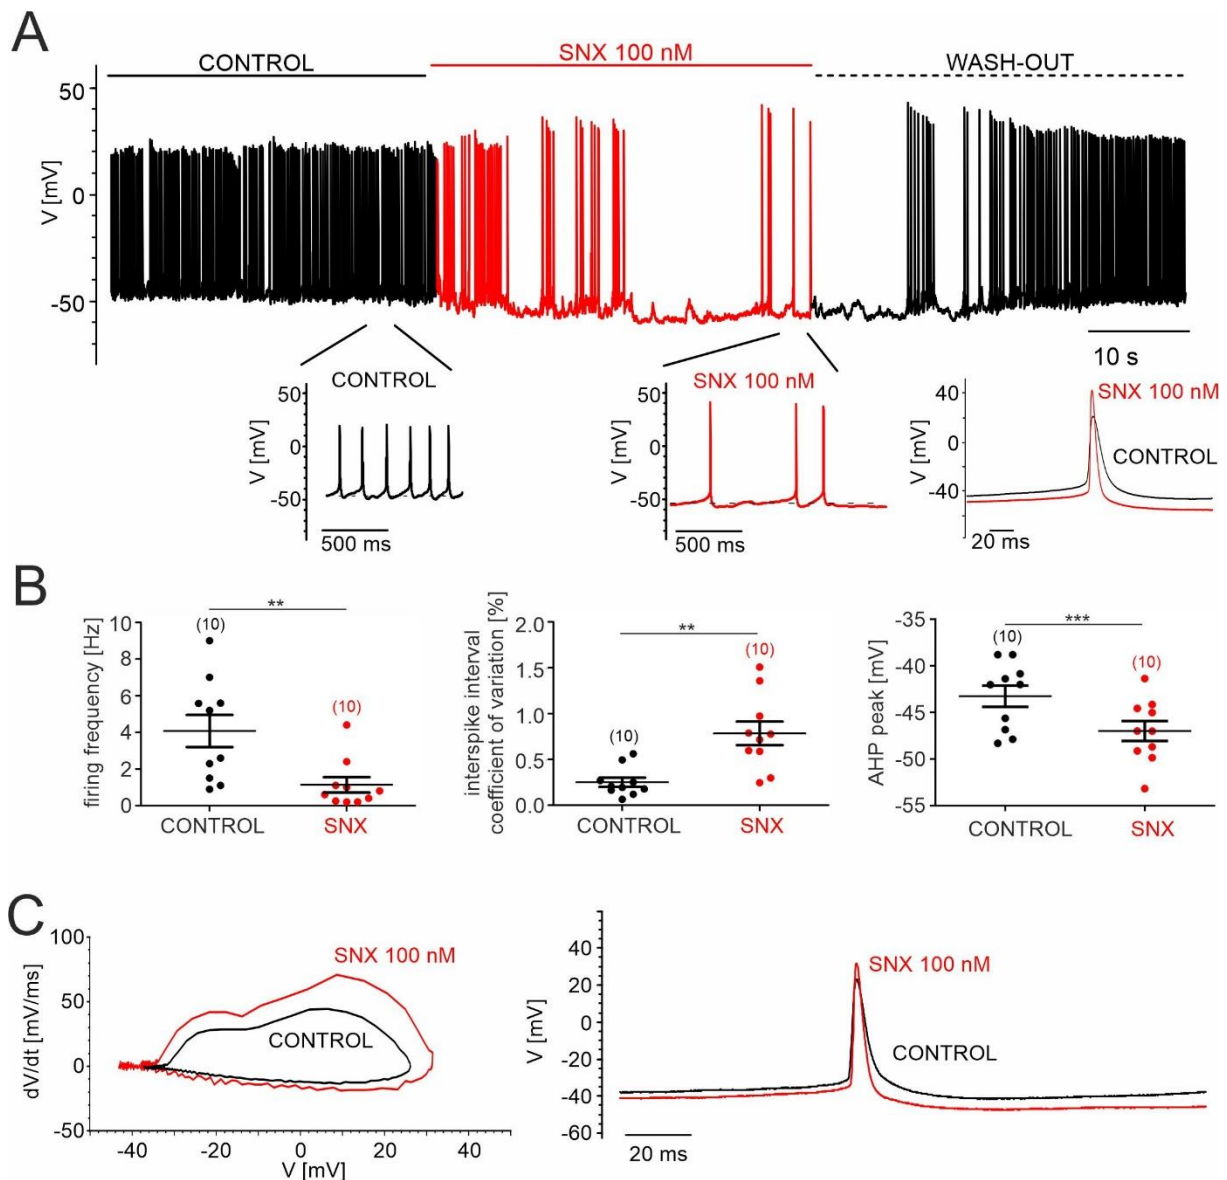

1059

1060 **Figure 1. SNX-482 effects on pacemaking of cultured mouse midbrain DA neurons.**

1061 **A.** Representative recording of spontaneous firing activity of cultured midbrain dopaminergic  
1062 neurons before, during and after the application (wash-out) of 100 nM SNX-482. Inset (bottom  
1063 right): overlay of one single AP before (control) and during the application of 100 nM SNX-482.

1064 **B.** Firing frequency [Hz], coefficient of variation of the interspike interval [%], and AHP peak  
1065 [mV] before (control) and during the application of 100 nM SNX-482. Statistical significance  
1066 was determined using paired Student's t-test.: \*\*\* p<0.001; \*\* p<0.01; \* p<0.05. **C.** Left panel:  
1067 Phase-plane plot analysis (time derivative of voltage (dV/dt) vs. voltage (V)) before (control)  
1068 and during the application of 100 nM SNX-482. Right panel: corresponding AP trace in control  
1069 and in the presence of SNX-482.

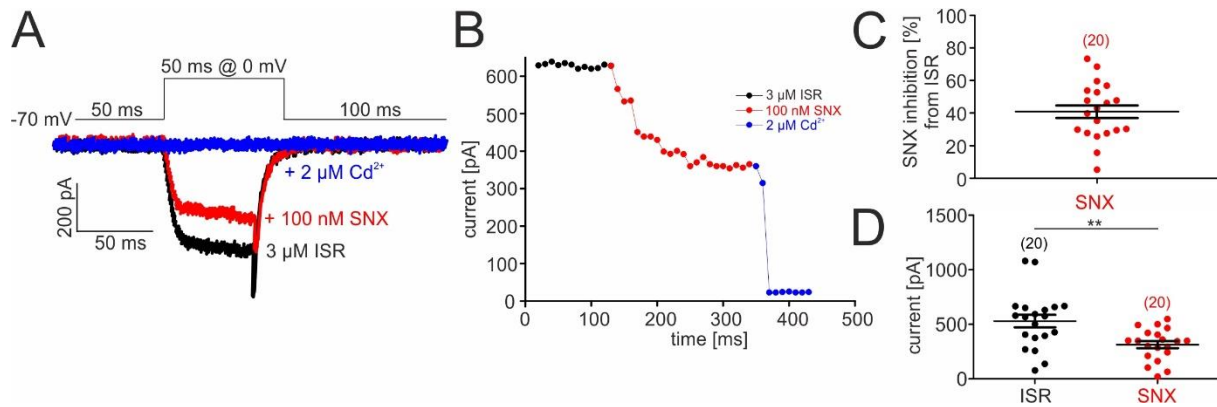

1070

1071

**Figure 2. SNX-482 inhibition of non-L-type  $I_{Ca}$  in cultured midbrain DA neurons.**

1072

**A.** Representative traces illustrating the inhibition of non-L-type  $I_{Ca}$  by 100 nM SNX-482 (red).

1073

Cells were initially perfused with a bath solution containing 3  $\mu$ M isradipine (ISR, black). Full

1074

block was obtained using 2  $\mu$ M  $Cd^{2+}$  (blue). Square pulses (50 ms) were applied to 0 mV from

1075

a holding potential of -70 mV (top) **B.** Current amplitude values plotted as a function of time.

1076

After stabilization of  $I_{Ca}$  with ISR (black circles), 100 nM SNX-482 was applied. The remaining

1077

currents was blocked by 2  $\mu$ M  $Cd^{2+}$ . **C.** SNX-482 inhibition expressed as % of control  $I_{Ca}$  after

1078

LTCC block using 3  $\mu$ M ISR. **D.** Mean current amplitude at the end of ISR application and at

1079

the end of SNX-482 application. Statistical significance was determined using paired Student's

1080

t-test: \*\*\*  $p < 0.001$ ; \*\*  $p < 0.01$ ; \*  $p < 0.05$ .

1081

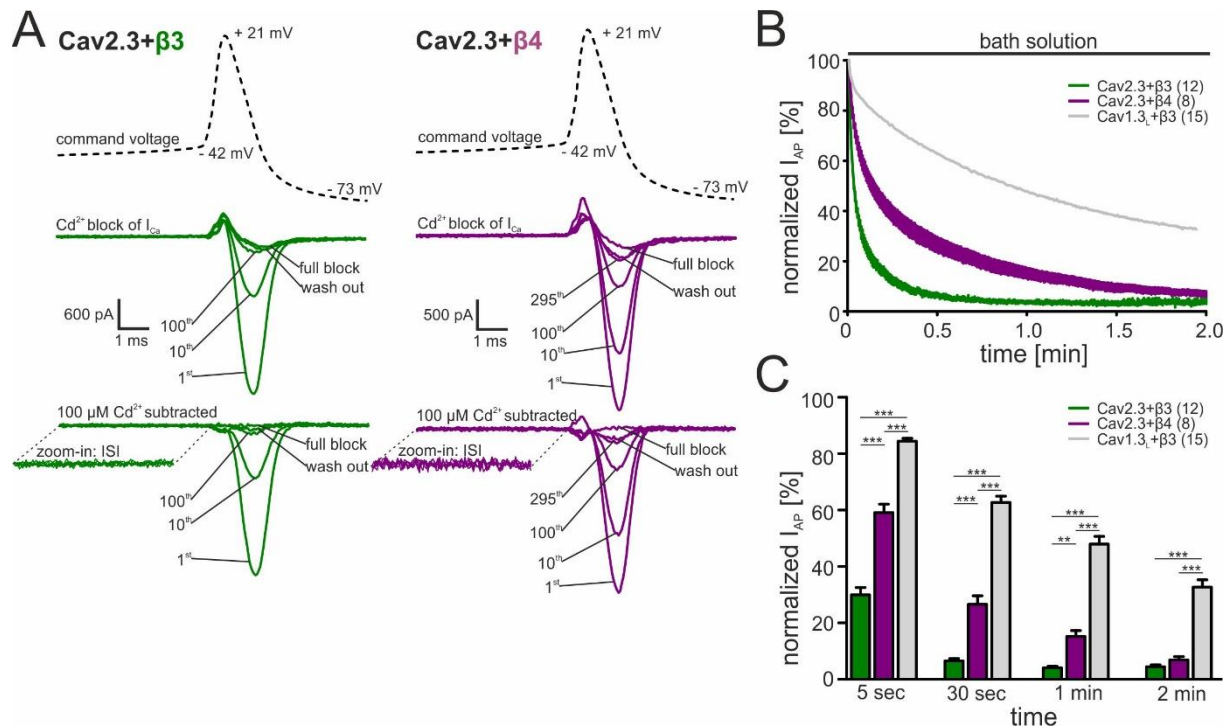

1082

1083 **Figure 3. Activity-dependent inactivation of Cav2.3 channels co-transfected with β3 or**  
 1084 **β4 (and α2δ1) during simulated SN DA neuron regular pacemaking activity in tsA-201**  
 1085 **cells.**

1086 **A.** Top panel: The SN DA neuron-derived command voltage was applied with a frequency of  
 1087 2.5 Hz (only a time interval around the AP-spike is shown). Middle panel: Corresponding  
 1088 representative Ca<sup>2+</sup> current traces (2 mM charge carrier) for Cav2.3 channels co-expressed  
 1089 with α2δ1 and β3 (green) or β4 (purple). Cav2.3 currents were completely blocked by 100 μM  
 1090 Cadmium (Cd<sup>2+</sup>), and remaining Cd<sup>2+</sup>-insensitive current components were subtracted off-line  
 1091 (bottom panel). ISI, interspike interval. **B.** Current decay during simulated 2.5 Hz SN DA neuron  
 1092 pacemaking. Normalized peak inward current during APs (I<sub>AP</sub>) is plotted against time as mean  
 1093 ± SEM for the indicated number of experiments. I<sub>AP</sub> amplitudes were normalized to the I<sub>AP</sub>  
 1094 amplitude of the first AP after holding the cell at -89 mV. Cav1.3<sub>L</sub> co-expressed with α2δ1 and  
 1095 β3 (gray, mean only) is shown for comparison (data taken from Ortner et al., 2017). The I<sub>AP</sub>  
 1096 decay was fitted to a bi-exponential function (Cav2.3 β3: A<sub>slow</sub> = 39.4 ± 0.65 %, τ<sub>slow</sub> = 22.2 ±  
 1097 0.15 min, A<sub>fast</sub> = 54.2 ± 0.76 %, τ<sub>fast</sub> = 2.86 ± 0.07 min, non-inactivating = 4.47 ± 0.13 %; β4:  
 1098 A<sub>slow</sub> = 48.5 ± 0.26 %, τ<sub>slow</sub> = 90.3 ± 1.07 min, A<sub>fast</sub> = 41.8 ± 0.40 %, τ<sub>fast</sub> = 8.39 ± 0.16 min,  
 1099 non-inactivating = 5.12 ± 0.12 %). **C.** Normalized I<sub>AP</sub> decay after predefined time points for Cav2.3  
 1100 with β3 or β4 and Cav1.3<sub>L</sub> (with β3). Statistical significance was determined using one-way  
 1101 ANOVA followed by Bonferroni post-hoc test: \*\*\* p<0.001; \*\* p<0.01; \* p<0.05.

1102

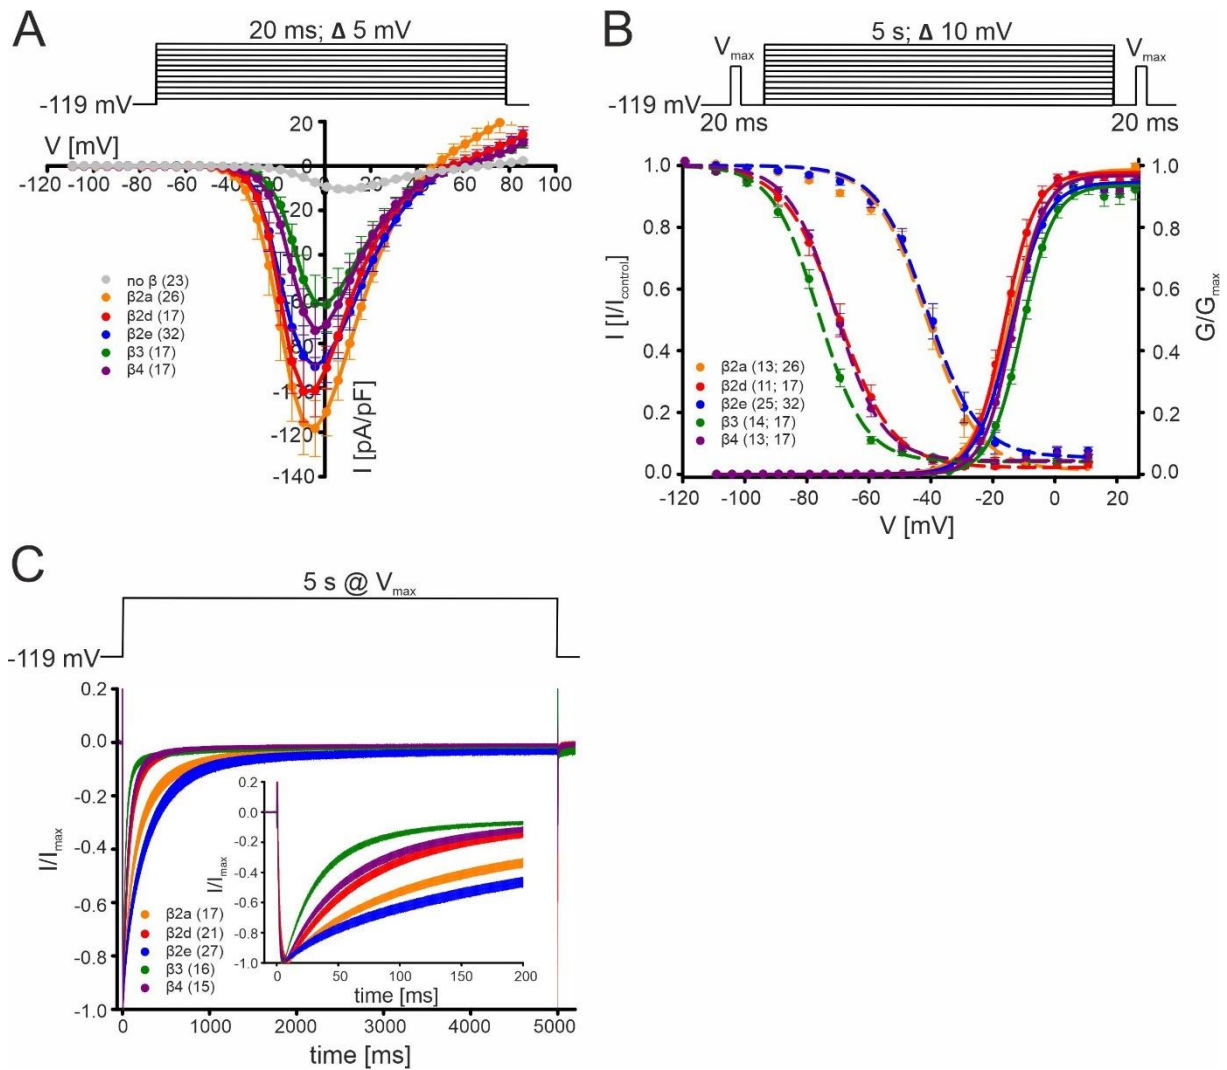

1103

1104 **Figure 4. Biophysical properties of Cav2.3 channels co-transfected with different  $\beta$ -**  
 1105 **subunits (and  $\alpha 2\delta 1$ ) in tsA-201 cells.**

1106 **A.** Current densities (pA/pF) with or without (gray) co-transfection of indicated  $\beta$ -subunits.  
 1107 Color code and n-numbers are given in the graphs. **B.** Voltage-dependence of steady-state  
 1108 activation (normalized conductance  $G$ , right axis, solid lines) and inactivation (normalized  $I_{Ca}$   
 1109 of test pulses, left axis, dashed lines, left n-numbers in parentheses). **C.** Inactivation time  
 1110 course during 5 s depolarizing pulses to  $V_{max}$  starting from a holding potential of -119 mV. Inset  
 1111 shows the first 200 ms of the 5 s pulse. Respective stimulation protocols are shown above  
 1112 each graph. For statistics see Table 1.  $V_{max}$ , voltage of maximal inward current.

1113

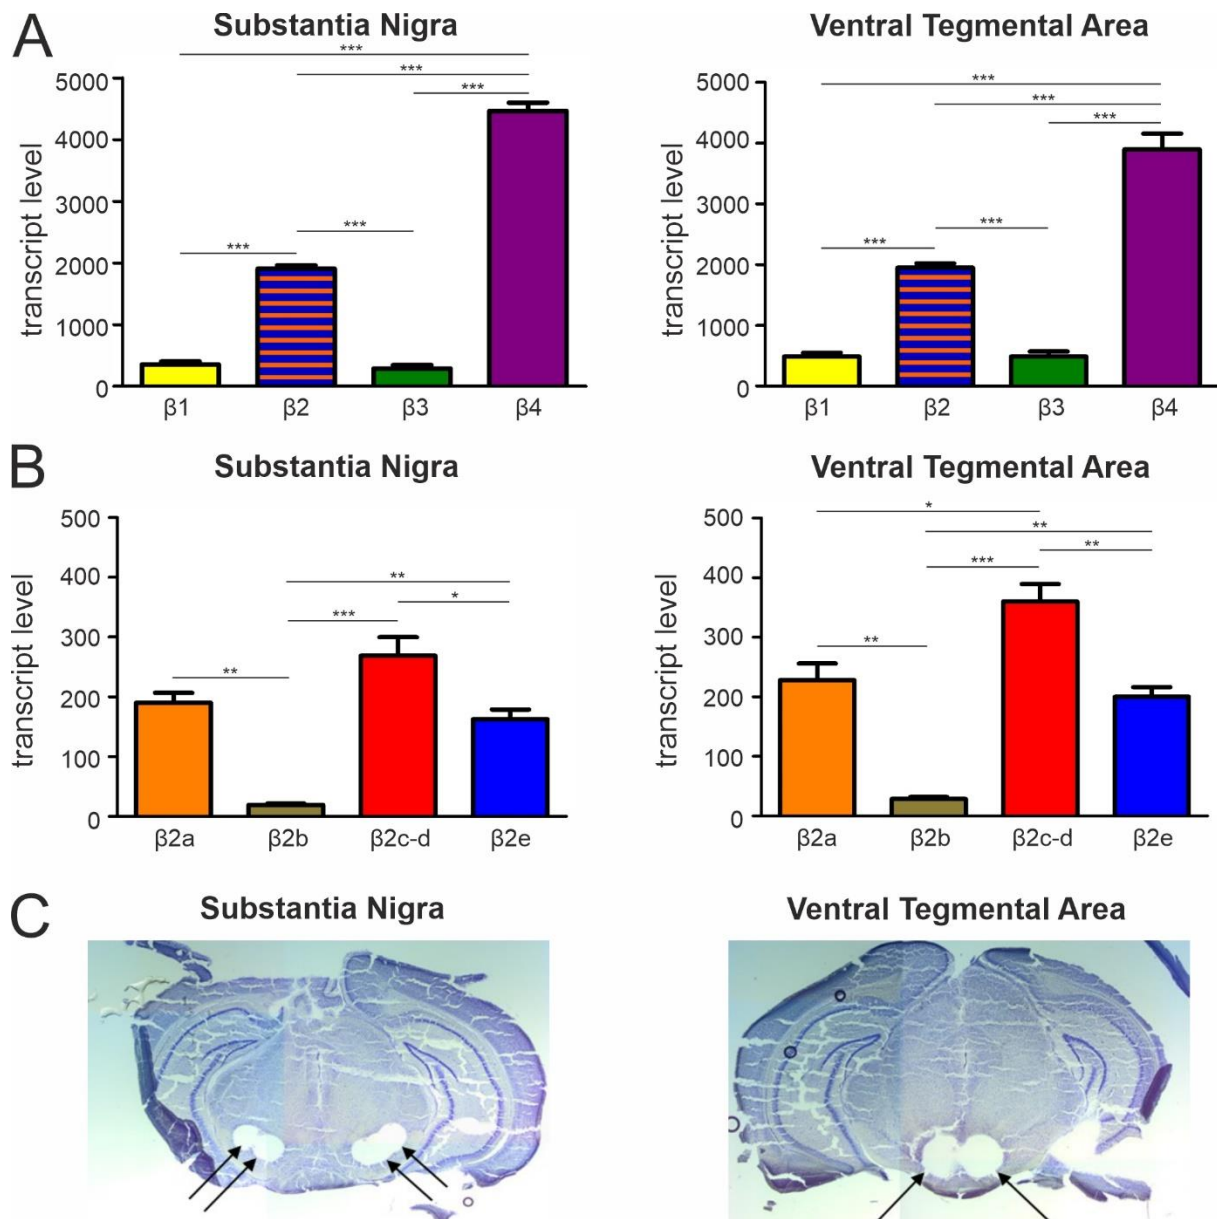

1114

1115 **Figure 5. Transcript expression of various  $\beta$ -subunits and  $\beta 2$ -subunit splice variants in**  
1116 **mouse SN and VTA tissue.**

1117 **A.** Expression of  $\beta 1$ - $\beta 4$  subunit transcripts in SN (n=3) (left) and VTA (n=3) (right) determined  
1118 by RT-qPCR as described in Methods. **B.** Expression of  $\beta 2a$ - $\beta 2e$  subunit transcripts in SN  
1119 (n=3) (left) and VTA (n=3) (right). Data are shown as the mean  $\pm$  SEM. Statistical significance  
1120 was determined using one-way ANOVA followed by Bonferroni post-hoc test: \*\*\* p<0.001; \*\*  
1121 p<0.01; \* p<0.05. Data was normalized to *Gapdh* and *Tfrc* determined by geNorm.

1122 **C.** Example for four SN (left) and two VTA (right) tissue punches obtained for cDNA preparation  
1123 with diameters of 0.5 mm each (left) or 0.8 mm each (right) from 7-8 successive 100- $\mu$ m-  
1124 sections between Bregma -3.00 mm and -3.80 mm, stained with Cresyl violet.

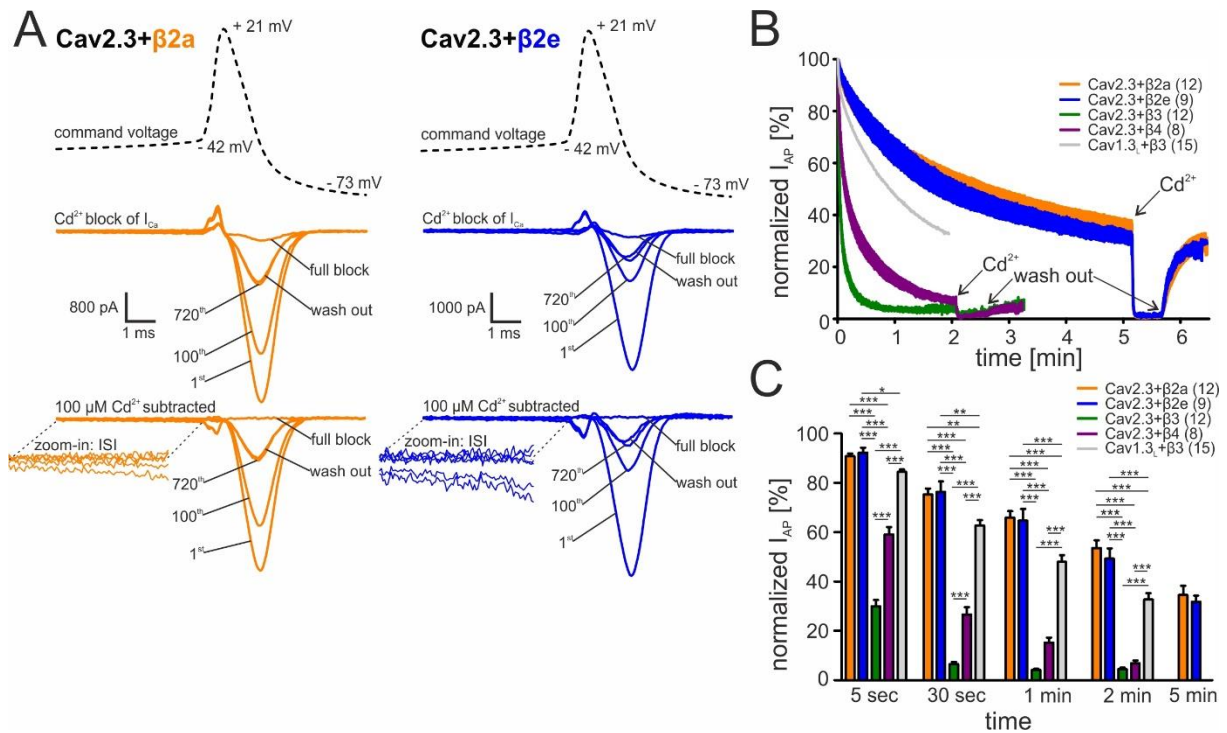

1125

1126 **Figure 6. Activity-dependent inactivation of Cav2.3 channels co-transfected with  $\beta 2a$  or**  
 1127  **$\beta 2e$  (and  $\alpha 2\delta 1$ ) during simulated SN DA neuron regular pacemaking activity in tsA-201**  
 1128 **cells.**

1129 **A.** Top panel: The SN DA neuron-derived command voltage was applied with a frequency of  
 1130 2.5 Hz (only a time interval around the AP-spike is shown). Middle panel: Corresponding  
 1131 representative  $Ca^{2+}$  current traces (2 mM charge carrier) for Cav2.3 channels co-expressed  
 1132 with  $\alpha 2\delta 1$  and  $\beta 2a$  (orange) or  $\beta 2e$  (blue). Cav2.3 currents were completely blocked by 100  
 1133  $\mu M$  Cadmium ( $Cd^{2+}$ ) and remaining  $Cd^{2+}$ -insensitive current components were subtracted off-  
 1134 line (bottom panel). **B.** Current decay (normalized  $I_{AP}$ ) is plotted over time as described in Fig.  
 1135 3. Cav2.3  $\beta 3$  (green),  $\beta 4$  (purple) and Cav1.3<sub>L</sub>/ $\beta 3$  data are shown for comparison (see Fig. 3).  
 1136 The  $I_{AP}$  decay was fitted using a bi-exponential function (Cav2.3  $\beta 2a$ :  $A_{slow} = 52.6 \pm 0.47 \%$ ,  
 1137  $\tau_{slow} = 299.3 \pm 10.2$  min,  $A_{fast} = 13.4 \pm 0.53 \%$ ,  $\tau_{fast} = 18.2 \pm 1.47$  min, non-inactivating =  $32.3 \pm$   
 1138  $0.77 \%$ ;  $\beta 2e$ :  $A_{slow} = 67.7 \pm 0.11 \%$ ,  $\tau_{slow} = 294.1 \pm 1.77$  min,  $A_{fast} = 7.10.0 \pm 0.27 \%$ ,  $\tau_{fast} = 16.6$   
 1139  $\pm 1.24$  min, non-inactivating =  $25.0 \pm 0.12\%$ ). **C.** Normalized  $I_{AP}$  decay after predefined time  
 1140 points for Cav2.3 with co-expressed  $\beta 2a$ ,  $\beta 2e$ ,  $\beta 3$  or  $\beta 4$  and Cav1.3<sub>L</sub> (with  $\beta 3$ ). Statistical  
 1141 significance was determined using one-way ANOVA followed by Bonferroni post-hoc test (5s,  
 1142 30s, 1 min, 2 min) or unpaired Student's t-test (5 min): \*\*\*  $p < 0.001$ ; \*\*  $p < 0.01$ ; \*  $p < 0.05$ .

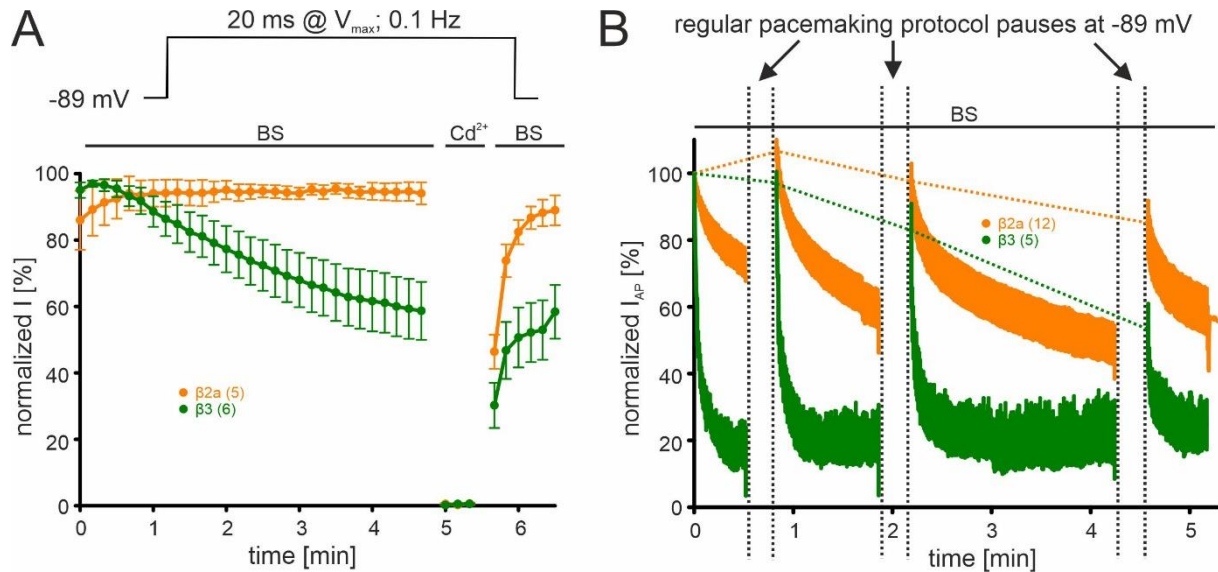

1143

1144 **Figure 7.  $\beta$ -subunit-dependent run-down of Cav2.3 channel  $\text{Ca}^{2+}$  current in tsA-201 cells.**

1145 Data for Cav2.3 co-expressed with  $\alpha\delta 1$  and  $\beta 2a$  (orange) or  $\beta 3$  (green) are shown. **A.** Run-

1146 down during a 0.1 Hz square pulse protocol (20 ms to  $V_{max}$ , hp -89 mV). Currents were

1147 normalized to the  $I_{Ca}$  of the sweep with the maximal peak inward current observed during the

1148 recording. After a full block with 100  $\mu\text{M}$   $\text{Cd}^{2+}$  currents recovered to the amplitude preceding

1149 the  $\text{Cd}^{2+}$  application. **B.** Cells were held at -89 mV and then stimulated using the regular SN

1150 DA neuron pacemaking protocol for 30 s, 1 min, and 2 min each followed by 20 s long pauses

1151 (vertical dashed lines) at hyperpolarized potentials (-89 mV) to allow channel recovery from

1152 inactivation.  $I_{AP}$  of individual APs was normalized to the inward current of the first AP. The

1153 current run-down component can be estimated from the non-recovering current component

1154 (horizontal dashed lines). Mean  $\pm$  SEM. BS, bath solution



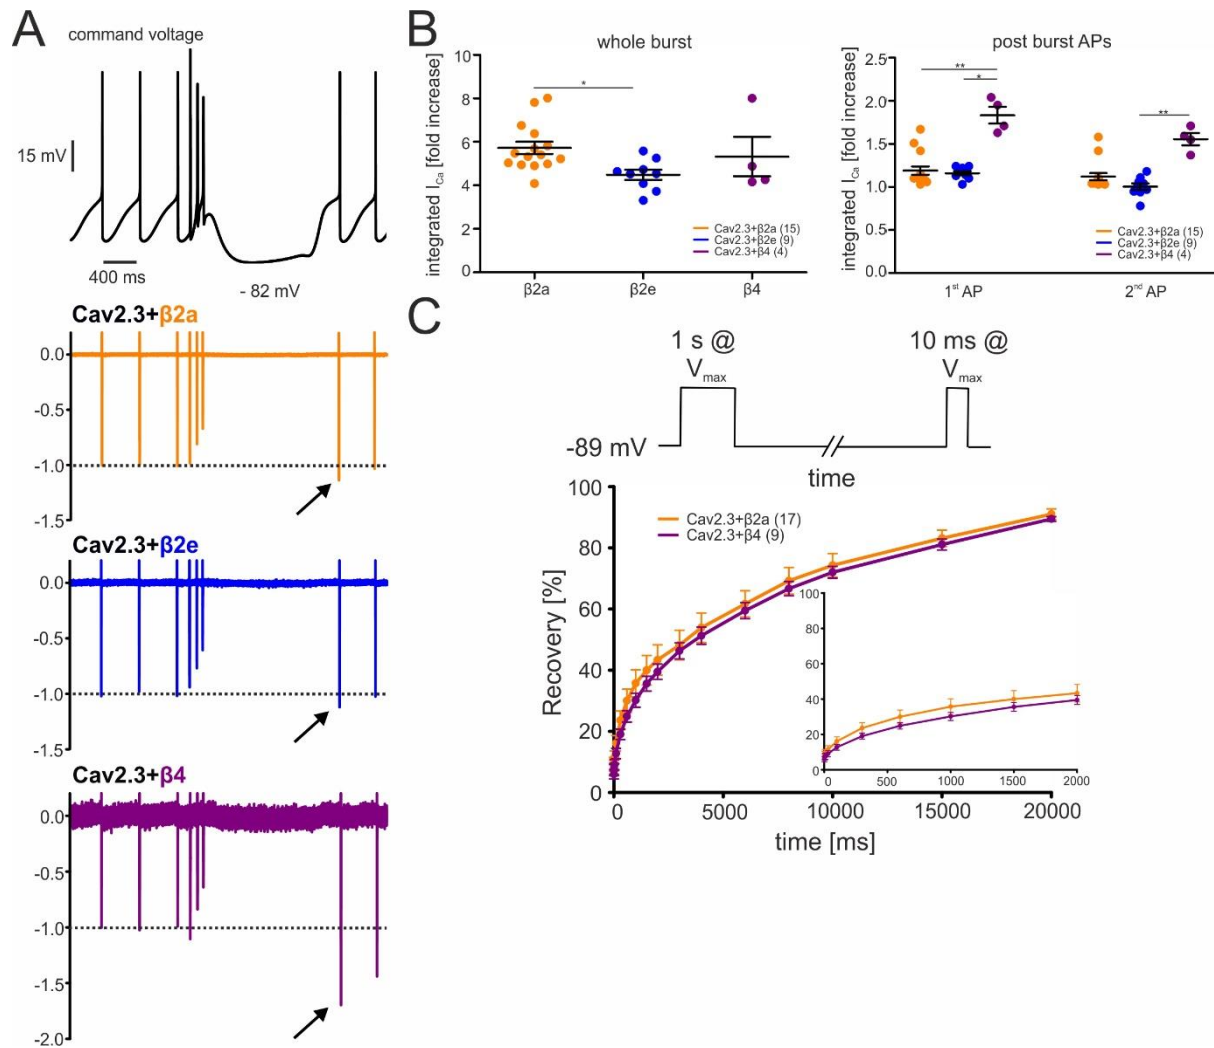

1155

1156 **Figure 8. Effects of different  $\beta$ -subunits on Cav2.3 currents during a simulated SN DA**  
1157 **neuron three-spike burst and post-burst APs in tsA-201 cells.**

1158 The burst command voltage was elicited after ~5-6 min ( $\beta$ 2a,  $\beta$ 2e) or ~1-2 min ( $\beta$ 4) of regular  
1159 pacemaking to reach steady-state  $I_{AP}$  ( $\beta$ 2a and  $\beta$ 2e: ~30% of the initial  $I_{AP}$ ,  $\beta$ 4: ~6% of the initial  
1160  $I_{AP}$ , see Fig. 6). **A.** Normalized current responses of Cav2.3 channels co-expressed with  $\beta$ 2a,  
1161  $\beta$ 2e or  $\beta$ 4 subunits (and  $\alpha$ 2 $\delta$ 1) induced by a command voltage (top panel) simulating a typical  
1162 three-spike burst followed by a hyperpolarization phase at hyperpolarized potentials (lowest  
1163 voltage: -82 mV) for 1.5 seconds. Remaining Cd<sup>2+</sup>-insensitive current components (100  $\mu$ M  
1164 Cd<sup>2+</sup>) were subtracted off-line to extract pure Cav2.3 mediated  $I_{Ca}$ . **B.** The integrated  $I_{Ca}$  during  
1165 a single AP before the burst (obtained as the mean of the three preceding APs) was set to 100  
1166 % and compared with  $I_{Ca}$  during the three-spike burst integrated over the time period equivalent  
1167 to one AP (left) or the first APs after the pause (right). All investigated  $\beta$ -subunits resulted in  
1168 increased integrated  $I_{Ca}$  during the burst. Statistical significance was determined using one-  
1169 way ANOVA followed by Bonferroni post-test: \*\*\*  $p < 0.001$ ; \*\*  $p < 0.01$ ; \*  $p < 0.05$ . **C.** Square-  
1170 pulse protocol (top) used to determine recovery from inactivation after the indicated time  
1171 intervals for  $\beta$ 2a and  $\beta$ 4-associated Cav2.3 channels (see Methods for details). For statistics  
1172 see Table 2.

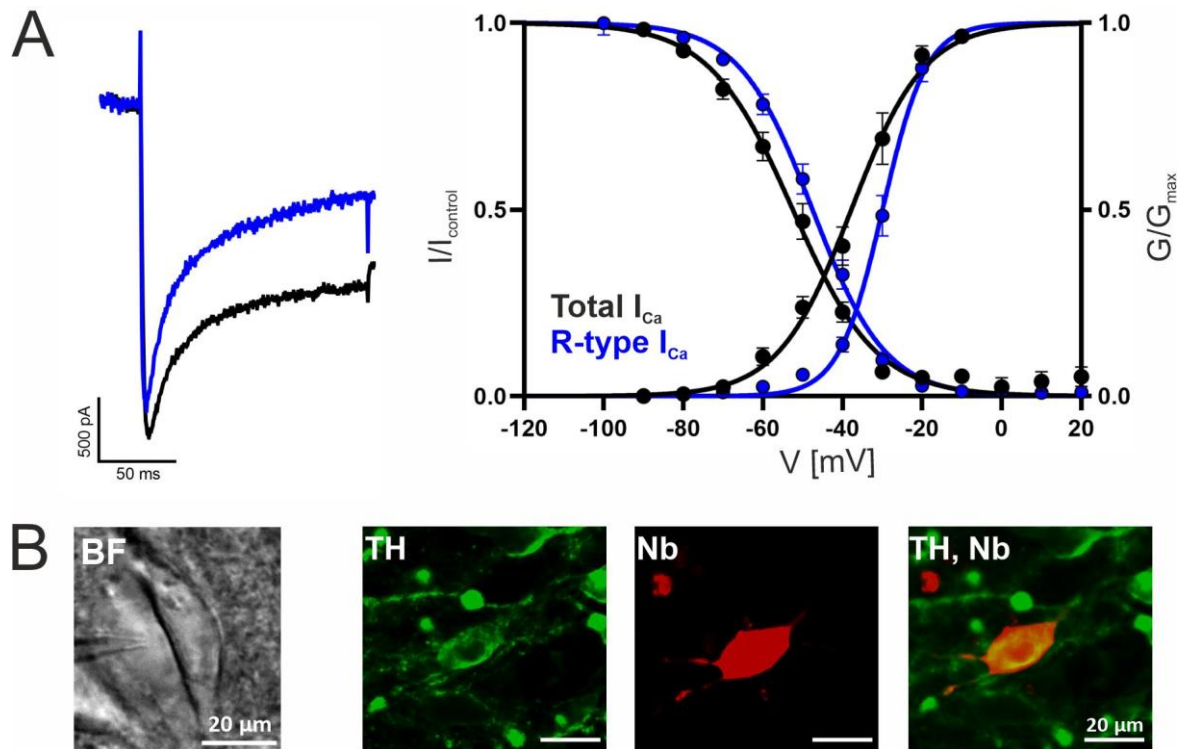

1173  
1174

1175 **Figure 9. Voltage-dependence of gating of R-type currents in mouse SN DA neurons.**

1176  $I_{Ca}$  recorded in SN DA neurons without (black traces/symbols) or after preincubation (blue) of

1177 slices with a Cav channel blocker cocktail to inhibit Cav3 (10  $\mu$ M Z941), Cav1 (1  $\mu$ M

1178 isradipine), Cav2.1 and Cav2.2 (1  $\mu$ M  $\omega$ -conotoxin-MVIIC). **A.** Left panel: representative

1179 current traces of recordings of steady-state activation (at -20 mV test potential, similar

1180 amplitudes were chosen). Right panel: voltage-dependence of steady-state activation and

1181 inactivation, curve fits to the mean values are shown. **B.** Exemplary neuron as seen under

1182 the patch clamp microscope with patch pipette next to it (left; BF, brightfield) and a neuron

1183 after histochemical staining for tyrosine hydroxylase (TH, green) and neurobiotin (Nb, red).

1184 Detailed parameters and statistics are given in Table 3.

1185 **Tables**

| $\beta$ -subunit                                            | Cav2.3 - Activation 2 mM Ca <sup>2+</sup> |                                  |                             |                            |                             |           | Cav2.3 - Inactivation 2 mM Ca <sup>2+</sup> |                         |             |    |
|-------------------------------------------------------------|-------------------------------------------|----------------------------------|-----------------------------|----------------------------|-----------------------------|-----------|---------------------------------------------|-------------------------|-------------|----|
|                                                             | V <sub>0.5</sub> [mV]                     | k [mV]                           | V <sub>rev</sub> [mV]       | act thresh [mV]            | current density [pA/pF]     | n         | V <sub>0.5, inact</sub> [mV]                | k <sub>inact</sub> [mV] | plateau [%] | n  |
| no $\beta$                                                  |                                           |                                  |                             |                            | -10.7 ±1.1                  | 23        |                                             |                         |             |    |
| $\beta$ 2a                                                  | -14.8 ±1.2                                | 4.8 ±0.2                         | 37.1 ±0.9                   | -32.0 ±0.9                 | -130.0 <sup>+++</sup> ±15.2 | 26        | -40.6 ±1.8                                  | 7.3 ±0.6                | 1.67 ±1.26  | 13 |
| c3s/c4s $\beta$ 2a                                          | -13.9 ±1.7                                | 4.7 ±0.3                         | 38.2 ±1.1                   | -30.9 ±0.7                 | -105.7 <sup>+++</sup> ±21.4 | 12        | -62.6 <sup>***/###/\$\$\$</sup> ±1.6        | 8.3 <sup>##</sup> ±0.4  | 4.57 ±1.63  | 9  |
| $\beta$ 2d                                                  | -15.9 <sup>§</sup> ±1.1                   | 4.6 ±0.2                         | 37.2 ±1.1                   | -32.1 <sup>§</sup> ±0.7    | -107.7 <sup>+++</sup> ±13.4 | 17        | -69.6 <sup>***/###</sup> ±1.8               | 8.2 <sup>##</sup> ±0.1  | 2.09 ±0.72  | 11 |
| $\beta$ 2e                                                  | -14.1 ±0.9                                | 4.8 ±0.2                         | 40.3* ±0.6                  | -31.5 ±0.7                 | -96.8 <sup>+++</sup> ±14.3  | 32        | -39.6 ±2.4                                  | 6.5 ±0.3                | 4.06 ±1.63  | 25 |
| $\beta$ 3                                                   | -10.5 ±0.7                                | 5.2 ±0.2                         | 39.8 ±0.9                   | -29.2 ±0.7                 | -64.6 <sup>++</sup> ±12.8   | 17        | -76.2 <sup>***/###</sup> ±1.0               | 7.0 ±0.1                | 4.12 ±0.70  | 14 |
| $\beta$ 4                                                   | -13.1 ±0.7                                | 5.0 ±0.2                         | 38.5 ±0.5                   | -31.0 ±0.5                 | -74.8 <sup>+++</sup> ±11.9  | 17        | -70.4 <sup>***/###</sup> ±1.2               | 7.3 ±0.2                | 4.06 ±1.80  | 13 |
| Cav2.3 - 5 s Inactivation time course 2 mM Ca <sup>2+</sup> |                                           |                                  |                             |                            |                             |           |                                             |                         |             |    |
| $\beta$ -subunit                                            | r50 [%]                                   | r100 [%]                         | r250 [%]                    | r500 [%]                   | r1000 [%]                   | r5000 [%] | n                                           |                         |             |    |
| $\beta$ 2a                                                  | 71.3 ±2.1                                 | 52.4 ±2.8                        | 27.8 ±2.9                   | 14.3 ±2.3                  | 6.5 ±1.2                    | 1.3 ±0.3  | 17                                          |                         |             |    |
| c3s/c4s $\beta$ 2a                                          | 67.4 <sup>\$\$\$%</sup> ±5.2              | 47.3 <sup>##/\$\$\$/%</sup> ±6.4 | 23.4 <sup>§</sup> ±5.3      | 11.6 ±3.3                  | 6.2 ±1.7                    | 3.4 ±1.1  | 11                                          |                         |             |    |
| $\beta$ 2d                                                  | 57.4 <sup>*/###/\$\$\$</sup> ±2.8         | 32.6 <sup>***/###/§</sup> ±2.4   | 11.3 <sup>*/###</sup> ±1.7  | 4.4 <sup>**/###</sup> ±0.9 | 2.4 <sup>**/###</sup> ±0.6  | 1.7 ±0.5  | 21                                          |                         |             |    |
| $\beta$ 2e                                                  | 77.5 ±2.9                                 | 64.2 ±3.3                        | 41.1 ±3.2                   | 22.3 ±2.8                  | 10.1 ±2.0                   | 3.3 ±0.8  | 27                                          |                         |             |    |
| $\beta$ 3                                                   | 32.9 <sup>***/###</sup> ±2.9              | 14.2 <sup>***/###</sup> ±1.5     | 6.1 <sup>***/###</sup> ±1.0 | 4.4 <sup>**/###</sup> ±0.7 | 2.9 <sup>#</sup> ±0.5       | 1.6 ±0.3  | 16                                          |                         |             |    |
| $\beta$ 4                                                   | 50.3 <sup>***/###/§</sup> ±2.7            | 27.1 <sup>***/###</sup> ±2.5     | 8.6 <sup>**/###</sup> ±1.4  | 3.7 <sup>**/###</sup> ±0.8 | 2.0 <sup>**/###</sup> ±0.5  | 1.0 ±0.2  | 15                                          |                         |             |    |

1186

1187 **Table 1. Voltage-dependence of activation and inactivation, and time course of**  
 1188 **inactivation of Cav2.3 co-transfected with  $\alpha$ 2 $\delta$ 1 and different  $\beta$  subunits in tsA-201**  
 1189 **cells.**

1190 All values are given as means ± SEM for the indicated number of experiments (n). Voltage-  
 1191 dependence of gating: V<sub>0.5</sub>, Half-maximal activation voltage; k, slope factor; V<sub>rev</sub>, estimated  
 1192 reversal potential; act thresh, activation threshold; V<sub>0.5, inact</sub>, half-maximal inactivation voltage;  
 1193 k<sub>inact</sub>, inactivation slope factor; plateau, remaining non-inactivating current. Near physiological  
 1194 recording conditions (2 mM Ca<sup>2+</sup>, low 0.5 mM EGTA Ca<sup>2+</sup> buffering) and calculation of the  
 1195 parameters of voltage-dependence of activation and inactivation are described in Materials  
 1196 and Methods. Statistical significance was determined using one-way ANOVA with Bonferroni  
 1197 post-hoc test. Statistical significances of post-hoc tests are indicated for comparison vs.  $\beta$ 2a  
 1198 (\*, \*\*, \*\*\*), vs.  $\beta$ 2e (#, ##, ###), vs.  $\beta$ 3 (§, §§, \$\$\$) and vs. no  $\beta$  (+, ++, +++): p<0.05, p<0.01, p<0.001.

1199 Inactivation time course: The r values represent the fraction of  $I_{Ca}$  remaining after 50, 100, 250,  
1200 500, 1000 or 5000 ms during a 5 s pulse to  $V_{max}$  (voltage of maximal inward current). Statistical  
1201 significance was determined using one-way ANOVA with Bonferroni post-hoc test. Statistical  
1202 significances of post hoc tests are indicated for comparison vs.  $\beta 2a$  (\*, \*\*, \*\*\*), vs.  $\beta 2e$  (#, ##,  
1203 ###), vs.  $\beta 3$  (§, §§, §§§) or vs  $\beta 4$  (% , %% , %%%):  $p < 0.05$ ,  $p < 0.01$ ,  $p < 0.001$ .

| <b>Cav2.3 - recovery from inactivation 2 mM Ca<sup>2+</sup></b> |                 |                  |                  |                   |          |
|-----------------------------------------------------------------|-----------------|------------------|------------------|-------------------|----------|
| <b>β-subunit</b>                                                | <b>r100 [%]</b> | <b>r1500 [%]</b> | <b>r4000 [%]</b> | <b>r10000 [%]</b> | <b>n</b> |
| β2a                                                             | 15.7<br>±2.4    | 39.3<br>±4.6     | 53.4<br>±4.5     | 74.2<br>±3.6      | 17       |
| β4                                                              | 12.7<br>±1.7    | 35.6<br>±2.4     | 51.3<br>±2.8     | 72.0<br>±1.9      | 9        |

1204

1205

**Table 2. Recovery from inactivation of Cav2.3 channels co-transfected with either β2a, β2e or β3 in combination with α2δ1 in tsA-201 cells.**

1206

1207

All values are presented as the mean ± SEM for the indicated number of experiments (n). The r values represent the fraction of recovered I<sub>Ca</sub> after 100, 1500, 4000 or 10000 ms at -89 mV between depolarizations to V<sub>max</sub>. No statistical significance was observed (unpaired Student's t-test).

1208

1209

1210

1211

|                                            | Activation            |                   |      | Inactivation            |                     |      |
|--------------------------------------------|-----------------------|-------------------|------|-------------------------|---------------------|------|
|                                            | $V_{0.5,act}$<br>[mV] | $k_{act}$<br>[mV] | n/N  | $V_{0.5,inact}$<br>[mV] | $k_{inact}$<br>[mV] | n/N  |
| <b>Control</b>                             | -37.4±1.8             | 7.2±0.58          | 16/8 | -52.4±1.58              | 9.57±0.54           | 16/8 |
| <b>+ T-, L-, N-, P/Q-<br/>Cav blockers</b> | -29.7±1.07**          | 4.42±0.28***      | 19/5 | -47.5±1.38*             | 8.15±0.37           | 19/5 |
| <b>+ 100 nM SNX-<br/>482</b>               | -42.7±2.3             | 7.73±0.65         | 8/2  | -51.3±1.35              | 10.7±0.85           | 9/2  |

1212

1213

**Table 3. Voltage-dependence of activation and inactivation of Ca<sup>2+</sup>-currents in SN DA neurons**

1214

1215

Whole cell patch-clamp experiments were performed as described in Methods in cells

1216

preincubated with a cocktail blocking T-, L-, N-, and P/Q-Ca<sup>2+</sup> channels (10μM Z941, 1μM

1217

isradipine, 1μM ω-conotoxin-MVIIC) to isolate R-type currents. N, number of preparations; n,

1218

number of experiments. Voltages were not corrected for liquid junction potential (- 5mV).

1219

Statistics: \*\*\*\*, p<0.0001; \*, p<0.05 (vs. control, Mann–Whitney U test).

1220

1221
